# Supplementary material for: The Effects of Previous Asthma and COPD on the Susceptibility to and Severity of COVID-19: A Nationwide Cohort Study in South Korea
Source: MDPI journal article supplement (doi:10.3390/jcm10204626), 2021-10-09
Supplement: s1 [file s1]

**Table S1.** Stratified subgroup analyses of crude and adjusted odds ratios of asthma and COPD for COVID-19 infection in total participants by covariates

| Characteristics              | COVID-19<br>(exposure/total, %) | Control<br>(exposure/total, %) | ORs (95% confidence interval) for COVID-19 |         |                  |         |                  |         |
|------------------------------|---------------------------------|--------------------------------|--------------------------------------------|---------|------------------|---------|------------------|---------|
|                              |                                 |                                | Crude†                                     | P-value | Model 1†‡        | P-value | Model 2†§        | P-value |
| <b>Age &lt; 60 years old</b> | <b>n = 2486</b>                 | <b>n = 9944</b>                |                                            |         |                  |         |                  |         |
| <b>Asthma</b>                |                                 |                                |                                            |         |                  |         |                  |         |
| Non-asthma                   | 2,317/2,486 (93.2%)             | 9,363/9,944 (94.2%)            | 1                                          |         | 1                |         | 1                |         |
| Mild-asthma                  | 151/2,486 (6.1%)                | 521/9,944 (5.2%)               | 1.17 (0.97-1.41)                           | 0.096   | 1.12 (0.93-1.36) | 0.242   | 1.11 (0.91-1.35) | 0.299   |
| Severe-asthma                | 18/2,486 (0.7%)                 | 60/9,944 (0.6%)                | 1.21 (0.72-2.06)                           | 0.475   | 1.18 (0.69-2.01) | 0.558   | 1.12 (0.65-1.93) | 0.682   |
| <b>COPD</b>                  |                                 |                                |                                            |         |                  |         |                  |         |
| Non-COPD                     | 2,424/2,486 (97.5%)             | 9,762/9,944 (98.2%)            | 1                                          |         | 1                |         | 1                |         |
| Mild- COPD                   | 34/2,486 (1.4%)                 | 110/9,944 (1.1%)               | 1.25 (0.85-1.83)                           | 0.267   | 1.26 (0.85-1.88) | 0.251   | 1.23 (0.83-1.84) | 0.303   |
| Severe- COPD                 | 28/2,486 (1.1%)                 | 72/9,944 (0.7%)                | 1.57 (1.01-2.43)                           | 0.045*  | 1.49 (0.95-2.33) | 0.083   | 1.47 (0.94-2.30) | 0.094   |
| <b>Age ≥ 60 years old</b>    | <b>n =1580</b>                  | <b>n =6320</b>                 |                                            |         |                  |         |                  |         |
| <b>Asthma</b>                |                                 |                                |                                            |         |                  |         |                  |         |
| Non-asthma                   | 1,387/1,580 (87.8%)             | 5,604/6,320 (88.7%)            | 1                                          |         | 1                |         | 1                |         |
| Mild-asthma                  | 171/1,580 (10.8%)               | 640/6,320 (10.1%)              | 1.08 (0.90-1.29)                           | 0.399   | 1.08 (0.89-1.30) | 0.437   | 1.06 (0.88-1.29) | 0.536   |
| Severe-asthma                | 22/1,580 (1.4%)                 | 76/6,320 (1.2%)                | 1.17 (0.73-1.89)                           | 0.520   | 1.21 (0.73-1.98) | 0.461   | 1.17 (0.70-1.93) | 0.553   |
| <b>COPD</b>                  |                                 |                                |                                            |         |                  |         |                  |         |
| Non-COPD                     | 1478/1,580 (93.5%)              | 5,963/6,320 (94.4%)            | 1                                          |         | 1                |         | 1                |         |
| Mild- COPD                   | 67/1,580 (4.2%)                 | 249/6,320 (3.9%)               | 1.09 (0.83-1.43)                           | 0.554   | 1.07 (0.80-1.43) | 0.640   | 1.04 (0.78-1.40) | 0.784   |
| Severe- COPD                 | 35/1,580 (2.2%)                 | 108/6,320 (1.7%)               | 1.31 (0.89-1.93)                           | 0.171   | 1.20 (0.80-1.80) | 0.389   | 1.16 (0.76-1.75) | 0.497   |
| <b>Men (n = 7,630)</b>       |                                 |                                |                                            |         |                  |         |                  |         |
| <b>Asthma</b>                |                                 |                                |                                            |         |                  |         |                  |         |
| Non-asthma                   | 1,406/1,526 (92.1%)             | 5,722/6,104 (93.7%)            | 1                                          |         | 1                |         | 1                |         |
| Mild-asthma                  | 106/1,526 (6.9%)                | 325/6,104 (5.3%)               | 1.34 (1.06-1.68)                           | 0.013*  | 1.29 (1.01-1.64) | 0.038*  | 1.30 (1.01-1.66) | 0.039*  |
| Severe-asthma                | 14/1,526 (0.9%)                 | 57/6,104 (0.9%)                | 1.01 (0.56-1.81)                           | 0.986   | 0.93 (0.50-1.72) | 0.812   | 0.93 (0.50-1.74) | 0.815   |
| <b>COPD</b>                  |                                 |                                |                                            |         |                  |         |                  |         |
| Non-COPD                     | 1,457/1,526 (95.5%)             | 5,864/6,104 (96.1%)            | 1                                          |         | 1                |         | 1                |         |

|                           |                     |                      |                  |        |                  |       |                  |       |
|---------------------------|---------------------|----------------------|------------------|--------|------------------|-------|------------------|-------|
| Mild- COPD                | 39/1,526 (2.6%)     | 162/6,104 (2.7%)     | 0.97 (0.68-1.39) | 0.878  | 0.93 (0.64-1.35) | 0.701 | 0.87 (0.59-1.28) | 0.482 |
| Severe- COPD              | 30/1,526 (2.0%)     | 78/6,104 (1.3%)      | 1.55 (1.01-2.38) | 0.044* | 1.23 (0.78-1.94) | 0.375 | 1.16 (0.73-1.85) | 0.528 |
| Women (n = 12,700)        |                     |                      |                  |        |                  |       |                  |       |
| Asthma                    |                     |                      |                  |        |                  |       |                  |       |
| Non-asthma                | 2,298/2,540 (90.5%) | 9,245/10,160 (91.0%) | 1                |        | 1                |       | 1                |       |
| Mild-asthma               | 216/2,540 (8.5%)    | 836/10,160 (8.2%)    | 1.04 (0.89-1.22) | 0.624  | 1.03 (0.88-1.21) | 0.704 | 1.01 (0.86-1.19) | 0.899 |
| Severe-asthma             | 26/2,540 (1.0%)     | 79/10,160 (0.8%)     | 1.33 (0.85-2.07) | 0.216  | 1.41 (0.89-2.22) | 0.140 | 1.33 (0.84-2.10) | 0.229 |
| COPD                      |                     |                      |                  |        |                  |       |                  |       |
| Non-COPD                  | 2,445/2,540 (96.3%) | 9,861/10,160 (97.1%) | 1                |        | 1                |       | 1                |       |
| Mild- COPD                | 62/2,540 (2.4%)     | 197/10,160 (1.9%)    | 1.27 (0.95-1.70) | 0.103  | 1.29 (0.96-1.74) | 0.093 | 1.27 (0.94-1.71) | 0.127 |
| Severe- COPD              | 33/2,540 (1.3%)     | 102/10,160 (1.0%)    | 1.31 (0.88-1.94) | 0.184  | 1.39 (0.93-2.08) | 0.111 | 1.36 (0.91-2.05) | 0.134 |
| Low income (n = 7,360)    |                     |                      |                  |        |                  |       |                  |       |
| Asthma                    |                     |                      |                  |        |                  |       |                  |       |
| Non-asthma                | 1,343/1,472 (91.2%) | 5,396/5,888 (91.6%)  | 1                |        | 1                |       | 1                |       |
| Mild-asthma               | 116/1,472 (7.9%)    | 436/5,888 (7.4%)     | 1.07 (0.86-1.33) | 0.538  | 1.05 (0.84-1.32) | 0.662 | 1.03 (0.82-1.29) | 0.800 |
| Severe-asthma             | 13/1,472 (0.9%)     | 56/5,888 (1.0%)      | 0.93 (0.51-1.71) | 0.823  | 1.01 (0.54-1.88) | 0.981 | 0.95 (0.51-1.79) | 0.877 |
| COPD                      |                     |                      |                  |        |                  |       |                  |       |
| Non-COPD                  | 1,415/1,472 (96.1%) | 5,690/5,888 (96.6%)  | 1                |        | 1                |       | 1                |       |
| Mild- COPD                | 36/1,472 (2.4%)     | 134/5,888 (2.3%)     | 1.08 (0.75-1.58) | 0.677  | 1.20 (0.81-1.76) | 0.362 | 1.19 (0.80-1.77) | 0.381 |
| Severe- COPD              | 21/1,472 (1.4%)     | 64/5,888 (1.1%)      | 1.32 (0.80-2.17) | 0.272  | 1.28 (0.76-2.16) | 0.349 | 1.28 (0.76-2.16) | 0.353 |
| Middle income (n = 6,245) |                     |                      |                  |        |                  |       |                  |       |
| Asthma                    |                     |                      |                  |        |                  |       |                  |       |
| Non-asthma                | 1,142/1,249 (91.4%) | 4,652/4,996 (93.1%)  | 1                |        | 1                |       | 1                |       |
| Mild-asthma               | 94/1,249 (7.5%)     | 315/4,996 (6.3%)     | 1.22 (0.96-1.55) | 0.106  | 1.21 (0.95-1.55) | 0.130 | 1.21 (0.94-1.55) | 0.137 |
| Severe-asthma             | 13/1,249 (1.0%)     | 29/4,996 (0.6%)      | 1.83 (0.95-3.53) | 0.071  | 1.52 (0.77-3.02) | 0.230 | 1.55 (0.77-3.10) | 0.216 |
| COPD                      |                     |                      |                  |        |                  |       |                  |       |
| Non-COPD                  | 1,206/1,249 (96.6%) | 4,843/4,996 (96.9%)  | 1                |        | 1                |       | 1                |       |
| Mild- COPD                | 26/1,249 (2.1%)     | 101/4,996 (2.0%)     | 1.04 (0.67-1.61) | 0.876  | 0.96 (0.61-1.52) | 0.863 | 0.90 (0.56-1.44) | 0.657 |
| Severe- COPD              | 17/1,249 (1.4%)     | 52/4,996 (1.0%)      | 1.31 (0.76-2.28) | 0.332  | 1.26 (0.72-2.22) | 0.424 | 1.20 (0.68-2.13) | 0.524 |
| High income (n = 6,725)   |                     |                      |                  |        |                  |       |                  |       |

**Asthma**

|               |                     |                     |                  |       |                  |       |                  |       |
|---------------|---------------------|---------------------|------------------|-------|------------------|-------|------------------|-------|
| Non-asthma    | 1,219/1,345 (90.6%) | 4,919/5,380 (91.4%) | 1                |       | 1                |       | 1                |       |
| Mild-asthma   | 112/1,345 (8.3%)    | 410/5,380 (7.6%)    | 1.11 (0.89-1.38) | 0.376 | 1.07 (0.85-1.34) | 0.561 | 1.04 (0.82-1.31) | 0.771 |
| Severe-asthma | 14/1,345 (1.0%)     | 51/5,380 (0.9%)     | 1.11 (0.61-2.01) | 0.733 | 1.17 (0.64-2.14) | 0.617 | 1.06 (0.57-1.98) | 0.851 |

**COPD**

|              |                     |                     |                  |       |                  |       |                  |       |
|--------------|---------------------|---------------------|------------------|-------|------------------|-------|------------------|-------|
| Non-COPD     | 1,281/1,345 (95.2%) | 5,192/5,380 (96.5%) | 1                |       | 1                |       | 1                |       |
| Mild- COPD   | 39/1,345 (2.9%)     | 124/5,380 (2.3%)    | 1.28 (0.89-1.85) | 0.184 | 1.19 (0.82-1.74) | 0.365 | 1.18 (0.80-1.73) | 0.402 |
| Severe- COPD | 25/1,345 (1.9%)     | 64/5,380 (1.2%)     | 1.59 (1.00-2.54) | 0.051 | 1.44 (0.88-2.35) | 0.146 | 1.41 (0.85-2.34) | 0.179 |

**Underweight (n = 700)****Asthma**

|               |                 |                 |                   |       |                   |       |                   |       |
|---------------|-----------------|-----------------|-------------------|-------|-------------------|-------|-------------------|-------|
| Non-asthma    | 119/129 (92.2%) | 532/571 (93.2%) | 1                 |       | 1                 |       | 1                 |       |
| Mild-asthma   | 8/129 (6.2%)    | 36/571 (6.3%)   | 0.99 (0.45-2.19)  | 0.987 | 1.03 (0.44-2.43)  | 0.939 | 0.56 (0.20-1.55)  | 0.265 |
| Severe-asthma | 2/129 (1.6%)    | 3/571 (0.5%)    | 2.98 (0.49-18.03) | 0.234 | 3.27 (0.49-21.72) | 0.220 | 3.65 (0.54-24.58) | 0.184 |

**COPD**

|              |                 |                 |                   |        |                   |        |                    |         |
|--------------|-----------------|-----------------|-------------------|--------|-------------------|--------|--------------------|---------|
| Non-COPD     | 119/129 (92.2%) | 558/571 (97.7%) | 1                 |        | 1                 |        | 1                  |         |
| Mild- COPD   | 8/129 (6.2%)    | 8/571 (1.4%)    | 4.69 (1.73-12.74) | 0.003* | 9.58 (2.96-31.03) | 0.001* | 12.56 (3.62-43.59) | <0.001* |
| Severe- COPD | 2/129 (1.6%)    | 5/571 (0.9%)    | 1.88 (0.36-9.78)  | 0.456  | 2.63 (0.36-19.03) | 0.338  | 2.72 (0.39-19.01)  | 0.314   |

**Normal weight (n =7,819 )****Asthma**

|               |                     |                     |                  |       |                  |       |                  |       |
|---------------|---------------------|---------------------|------------------|-------|------------------|-------|------------------|-------|
| Non-asthma    | 1,339/1,458 (91.8%) | 5,901/6,361 (92.8%) | 1                |       | 1                |       | 1                |       |
| Mild-asthma   | 106/1,458 (7.3%)    | 413/6,361 (6.5%)    | 1.13 (0.91-1.41) | 0.276 | 1.17 (0.93-1.47) | 0.181 | 1.13 (0.89-1.42) | 0.312 |
| Severe-asthma | 13/1,458 (0.9%)     | 47/6,361 (0.7%)     | 1.22 (0.66-2.26) | 0.529 | 1.33 (0.70-2.53) | 0.383 | 1.22 (0.63-2.34) | 0.557 |

**COPD**

|              |                     |                     |                  |        |                  |        |                  |        |
|--------------|---------------------|---------------------|------------------|--------|------------------|--------|------------------|--------|
| Non-COPD     | 1,397/1,458 (95.8%) | 6,171/6,361 (97.0%) | 1                |        | 1                |        | 1                |        |
| Mild- COPD   | 34/1,458 (2.3%)     | 127/6,361 (2.0%)    | 1.18 (0.81-1.73) | 0.391  | 1.16 (0.77-1.73) | 0.477  | 1.11 (0.74-1.67) | 0.617  |
| Severe- COPD | 27/1,458 (1.9%)     | 63/6,361 (1.0%)     | 1.89 (1.20-2.98) | 0.006* | 1.95 (1.22-3.13) | 0.006* | 1.88 (1.17-3.03) | 0.010* |

**Overweight (n = 4,868)****Asthma**

|             |                   |                     |                  |       |                  |       |                  |       |
|-------------|-------------------|---------------------|------------------|-------|------------------|-------|------------------|-------|
| Non-asthma  | 923/1,010 (91.4%) | 3,569/3,858 (92.5%) | 1                |       | 1                |       | 1                |       |
| Mild-asthma | 77/1,010 (7.6%)   | 263/3,858 (6.8%)    | 1.13 (0.87-1.47) | 0.357 | 1.11 (0.85-1.47) | 0.442 | 1.11 (0.84-1.47) | 0.458 |

|                                           |                     |                       |                  |        |                  |        |                  |        |
|-------------------------------------------|---------------------|-----------------------|------------------|--------|------------------|--------|------------------|--------|
| Severe-asthma                             | 10/1,010 (1.0%)     | 26/3,858 (0.7%)       | 1.49 (0.72-3.10) | 0.288  | 1.25 (0.59-2.68) | 0.564  | 1.24 (0.57-2.71) | 0.583  |
| <b>COPD</b>                               |                     |                       |                  |        |                  |        |                  |        |
| Non-COPD                                  | 970/1,010 (96.0%)   | 3,725/3,858 (96.6%)   | 1                |        | 1                |        | 1                |        |
| Mild- COPD                                | 27/1,010 (2.7%)     | 94/3,858 (2.4%)       | 1.10 (0.72-1.70) | 0.658  | 1.08 (0.69-1.71) | 0.731  | 1.05 (0.66-1.66) | 0.844  |
| Severe- COPD                              | 13/1,010 (1.3%)     | 39/3,858 (1.0%)       | 1.28 (0.68-2.41) | 0.443  | 1.05 (0.54-2.02) | 0.896  | 0.99 (0.50-1.94) | 0.964  |
| <b>Obese (n = 6,943)</b>                  |                     |                       |                  |        |                  |        |                  |        |
| <b>Asthma</b>                             |                     |                       |                  |        |                  |        |                  |        |
| Non-asthma                                | 1,323/1,469 (90.1%) | 4,965/5,474 (90.7%)   | 1                |        | 1                |        | 1                |        |
| Mild-asthma                               | 131/1,469 (8.9%)    | 449/5,474 (8.2%)      | 1.10 (0.89-1.34) | 0.383  | 1.03 (0.83-1.27) | 0.804  | 1.04 (0.83-1.29) | 0.747  |
| Severe-asthma                             | 15/1,469 (1.0%)     | 60/5,474 (1.1%)       | 0.94 (0.53-1.66) | 0.826  | 0.96 (0.54-1.71) | 0.886  | 0.98 (0.55-1.76) | 0.940  |
| <b>COPD</b>                               |                     |                       |                  |        |                  |        |                  |        |
| Non-COPD                                  | 1,416/1,469 (96.4%) | 5,271/5,474 (96.3%)   | 1                |        | 1                |        | 1                |        |
| Mild- COPD                                | 32/1,469 (2.2%)     | 130/5,474 (2.4%)      | 0.92 (0.62-1.36) | 0.661  | 0.91 (0.61-1.36) | 0.635  | 0.90 (0.60-1.36) | 0.617  |
| Severe- COPD                              | 21/1,469 (1.4%)     | 73/5,474 (1.3%)       | 1.07 (0.66-1.75) | 0.784  | 0.96 (0.58-1.60) | 0.881  | 0.96 (0.57-1.60) | 0.869  |
| <b>Non-smoker (n = 14,753)</b>            |                     |                       |                  |        |                  |        |                  |        |
| <b>Asthma</b>                             |                     |                       |                  |        |                  |        |                  |        |
| Non-asthma                                | 2,906/3,181 (91.4%) | 10,609/11,572 (91.7%) | 1                |        | 1                |        | 1                |        |
| Mild-asthma                               | 247/3,181 (7.8%)    | 880/11,572 (7.6%)     | 1.03 (0.89-1.19) | 0.745  | 1.04 (0.89-1.21) | 0.604  | 1.02 (0.88-1.19) | 0.796  |
| Severe-asthma                             | 28/3,181 (0.9%)     | 83/11,572 (0.7%)      | 1.23 (0.80-1.89) | 0.343  | 1.28 (0.82-2.00) | 0.270  | 1.22 (0.78-1.90) | 0.393  |
| <b>COPD</b>                               |                     |                       |                  |        |                  |        |                  |        |
| Non-COPD                                  | 3,062/3,181 (96.3%) | 11,225/11,572 (97.0%) | 1                |        | 1                |        | 1                |        |
| Mild- COPD                                | 72/3,181 (2.3%)     | 223/11,572 (1.9%)     | 1.18 (0.91-1.55) | 0.219  | 1.17 (0.89-1.55) | 0.263  | 1.16 (0.87-1.53) | 0.316  |
| Severe- COPD                              | 47/3,181 (1.5%)     | 124/11,572 (1.1%)     | 1.39 (0.99-1.95) | 0.056  | 1.39 (0.98-1.97) | 0.063  | 1.37 (0.96-1.94) | 0.080  |
| <b>Past or current smoker (n = 5,577)</b> |                     |                       |                  |        |                  |        |                  |        |
| <b>Asthma</b>                             |                     |                       |                  |        |                  |        |                  |        |
| Non-asthma                                | 798/885 (90.2%)     | 4,358/4,692 (92.9%)   | 1                |        | 1                |        | 1                |        |
| Mild-asthma                               | 75/885 (8.5%)       | 281/4,692 (6.0%)      | 1.46 (1.12-1.90) | 0.005* | 1.36 (1.03-1.79) | 0.032* | 1.37 (1.03-1.83) | 0.031* |
| Severe-asthma                             | 12/885 (1.4%)       | 53/4,692 (1.1%)       | 1.24 (0.66-2.32) | 0.510  | 1.21 (0.63-2.32) | 0.565  | 1.23 (0.63-2.41) | 0.537  |
| <b>COPD</b>                               |                     |                       |                  |        |                  |        |                  |        |

|                                                                                                     |                     |                       |                  |        |                  |       |                  |       |
|-----------------------------------------------------------------------------------------------------|---------------------|-----------------------|------------------|--------|------------------|-------|------------------|-------|
| Non-COPD                                                                                            | 840/885 (94.9%)     | 4,500/4,692 (95.9%)   | 1                |        | 1                |       | 1                |       |
| Mild-COPD                                                                                           | 29/885 (3.3%)       | 136/4,692 (2.9%)      | 1.14 (0.76-1.72) | 0.522  | 1.00 (0.65-1.53) | 0.999 | 0.90 (0.58-1.39) | 0.623 |
| Severe-COPD                                                                                         | 16/885 (1.8%)       | 56/4,692 (1.2%)       | 1.53 (0.88-2.68) | 0.136  | 1.17 (0.64-2.11) | 0.616 | 1.04 (0.56-1.92) | 0.907 |
| <b>Alcohol consumption &lt; 1 time a week (n = 13,465)</b>                                          |                     |                       |                  |        |                  |       |                  |       |
| <b>Asthma</b>                                                                                       |                     |                       |                  |        |                  |       |                  |       |
| Non-asthma                                                                                          | 2,676/2,968 (90.2%) | 9,534/10,497 (90.8%)  | 1                |        | 1                |       | 1                |       |
| Mild-asthma                                                                                         | 259/2,968 (8.7%)    | 855/10,497 (8.1%)     | 1.08 (0.93-1.25) | 0.304  | 1.10 (0.95-1.28) | 0.217 | 1.09 (0.93-1.27) | 0.298 |
| Severe-asthma                                                                                       | 33/2,968 (1.1%)     | 108/10,497 (1.0%)     | 1.09 (0.74-1.61) | 0.671  | 1.17 (0.78-1.75) | 0.441 | 1.13 (0.75-1.70) | 0.563 |
| <b>COPD</b>                                                                                         |                     |                       |                  |        |                  |       |                  |       |
| Non-COPD                                                                                            | 2,842/2,968 (95.8%) | 10,107/10,497 (96.3%) | 1                |        | 1                |       | 1                |       |
| Mild- COPD                                                                                          | 78/2,968 (2.6%)     | 263/10,497 (2.5%)     | 1.06 (0.82-1.36) | 0.684  | 1.10 (0.84-1.43) | 0.500 | 1.07 (0.81-1.40) | 0.637 |
| Severe-COPD                                                                                         | 48/2,968 (1.6%)     | 127/10,497 (1.2%)     | 1.34 (0.96-1.88) | 0.083  | 1.30 (0.92-1.85) | 0.137 | 1.27 (0.89-1.80) | 0.187 |
| <b>Alcohol consumption ≥1 time a week (n = 6,865)</b>                                               |                     |                       |                  |        |                  |       |                  |       |
| <b>Asthma</b>                                                                                       |                     |                       |                  |        |                  |       |                  |       |
| Non-asthma                                                                                          | 1,028/1,098 (93.6%) | 5,433/5,767 (94.2%)   | 1                |        | 1                |       | 1                |       |
| Mild-asthma                                                                                         | 63/1,098 (5.7%)     | 306/5,767 (5.3%)      | 1.09 (0.82-1.44) | 0.554  | 1.09 (0.82-1.45) | 0.562 | 1.06 (0.79-1.42) | 0.695 |
| Severe-asthma                                                                                       | 7/1,098 (0.6%)      | 28/5,767 (0.5%)       | 1.32 (0.58-3.03) | 0.511  | 1.31 (0.55-3.13) | 0.547 | 1.20 (0.50-2.91) | 0.682 |
| <b>COPD</b>                                                                                         |                     |                       |                  |        |                  |       |                  |       |
| Non-COPD                                                                                            | 1,060/1,098 (96.5%) | 5,618/5,767 (97.4%)   | 1                |        | 1                |       | 1                |       |
| Mild- COPD                                                                                          | 23/1,098 (2.1%)     | 96/5,767 (1.7%)       | 1.27 (0.80-2.01) | 0.308  | 1.21 (0.75-1.95) | 0.444 | 1.18 (0.72-1.92) | 0.514 |
| Severe-COPD                                                                                         | 15/1,098 (1.4%)     | 53/5,767 (0.9%)       | 1.50 (0.84-2.67) | 0.167  | 1.42 (0.78-2.59) | 0.256 | 1.38 (0.75-2.54) | 0.297 |
| <b>Systolic blood pressure &lt; 140 mmHg and diastolic blood pressure &lt; 90 mmHg (n = 17,427)</b> |                     |                       |                  |        |                  |       |                  |       |
| <b>Asthma</b>                                                                                       |                     |                       |                  |        |                  |       |                  |       |
| Non-asthma                                                                                          | 3,218/3,530 (91.2%) | 12,834/13,897 (92.4%) | 1                |        | 1                |       | 1                |       |
| Mild-asthma                                                                                         | 280/3,530 (7.9%)    | 948/13,897 (6.8%)     | 1.18 (1.03-1.35) | 0.021* | 1.15 (1.00-1.33) | 0.056 | 1.13 (0.98-1.31) | 0.099 |
| Severe-asthma                                                                                       | 32/3,530 (0.9%)     | 115/13,897 (0.8%)     | 1.11 (0.75-1.65) | 0.604  | 1.10 (0.74-1.66) | 0.632 | 1.05 (0.70-1.58) | 0.817 |
| <b>COPD</b>                                                                                         |                     |                       |                  |        |                  |       |                  |       |
| Non-COPD                                                                                            | 3,395/3,530 (96.2%) | 13,466/13,897 (96.9%) | 1                |        | 1                |       | 1                |       |
| Mild-COPD                                                                                           | 81/3,530 (2.3%)     | 279/13,897 (2.0%)     | 1.15 (0.90-1.48) | 0.269  | 1.13 (0.87-1.46) | 0.365 | 1.10 (0.84-1.43) | 0.500 |
| Severe-COPD                                                                                         | 54/3,530 (1.5%)     | 152/13,897 (1.1%)     | 1.41 (1.03-1.93) | 0.032* | 1.37 (0.99-1.90) | 0.058 | 1.33 (0.96-1.85) | 0.092 |

**Systolic blood pressure  $\geq$  140 mmHg or diastolic blood pressure  $\geq$ 90 mmHg (n = 2,903)****Asthma**

|               |                 |                     |                  |       |                  |       |                  |       |
|---------------|-----------------|---------------------|------------------|-------|------------------|-------|------------------|-------|
| Non-asthma    | 486/536 (90.7%) | 2,133/2,367 (90.1%) | 1                |       | 1                |       | 1                |       |
| Mild-asthma   | 42/536 (7.8%)   | 213/2,367 (9.0%)    | 0.87 (0.61-1.22) | 0.412 | 0.79 (0.55-1.15) | 0.216 | 0.79 (0.54-1.14) | 0.203 |
| Severe-asthma | 8/536 (1.5%)    | 21/2,367 (0.9%)     | 1.68 (0.74-3.80) | 0.218 | 1.73 (0.74-4.04) | 0.209 | 1.68 (0.70-4.00) | 0.245 |

**COPD**

|             |                 |                     |                  |       |                  |       |                  |       |
|-------------|-----------------|---------------------|------------------|-------|------------------|-------|------------------|-------|
| Non-COPD    | 507/536 (94.6%) | 2,259/2,367 (95.4%) | 1                |       | 1                |       | 1                |       |
| Mild-COPD   | 20/536 (3.7%)   | 80/2,367 (3.4%)     | 1.11 (0.68-1.84) | 0.672 | 1.07 (0.63-1.82) | 0.791 | 1.08 (0.62-1.86) | 0.792 |
| Severe-COPD | 9/536 (1.7%)    | 28/2,367 (1.2%)     | 1.43 (0.67-3.06) | 0.352 | 1.07 (0.48-2.40) | 0.866 | 1.08 (0.48-2.43) | 0.851 |

**Fasting blood glucose < 100 mg/dL (n = 12,806)****Asthma**

|               |                     |                      |                  |       |                  |       |                  |       |
|---------------|---------------------|----------------------|------------------|-------|------------------|-------|------------------|-------|
| Non-asthma    | 2,309/2,522 (91.6%) | 9,465/10,284 (92.0%) | 1                |       | 1                |       | 1                |       |
| Mild-asthma   | 192/2,522 (7.6%)    | 730/10,284 (7.1%)    | 1.08 (0.91-1.27) | 0.373 | 1.04 (0.88-1.24) | 0.635 | 1.02 (0.85-1.21) | 0.870 |
| Severe-asthma | 21/2,522 (0.8%)     | 89/10,284 (0.9%)     | 0.97 (0.60-1.56) | 0.891 | 0.93 (0.57-1.52) | 0.773 | 0.87 (0.53-1.42) | 0.578 |

**COPD**

|             |                     |                      |                  |       |                  |       |                  |       |
|-------------|---------------------|----------------------|------------------|-------|------------------|-------|------------------|-------|
| Non-COPD    | 2,424/2,522 (96.1%) | 9,967/10,284 (96.9%) | 1                |       | 1                |       | 1                |       |
| Mild-COPD   | 58/2,522 (2.3%)     | 201/10,284 (2.0%)    | 1.19 (0.88-1.59) | 0.257 | 1.20 (0.88-1.62) | 0.250 | 1.20 (0.88-1.64) | 0.243 |
| Severe-COPD | 40/2,522 (1.6%)     | 116/10,284 (1.1%)    | 1.42 (0.99-2.04) | 0.059 | 1.40 (0.96-2.04) | 0.078 | 1.41 (0.97-2.07) | 0.075 |

**Fasting blood glucose  $\geq$  100 mg/dL (n =7,524)****Asthma**

|               |                     |                     |                  |       |                  |       |                  |       |
|---------------|---------------------|---------------------|------------------|-------|------------------|-------|------------------|-------|
| Non-asthma    | 1,395/1,544 (90.3%) | 5,502/5,980 (92.0%) | 1                |       | 1                |       | 1                |       |
| Mild-asthma   | 130/1,544 (8.4%)    | 431/5,980 (7.2%)    | 1.19 (0.97-1.46) | 0.096 | 1.19 (0.96-1.48) | 0.107 | 1.20 (0.96-1.49) | 0.106 |
| Severe-asthma | 19/1,544 (1.2%)     | 47/5,980 (0.8%)     | 1.60 (0.93-2.73) | 0.088 | 1.67 (0.95-2.93) | 0.077 | 1.68 (0.94-2.99) | 0.078 |

**COPD**

|             |                     |                     |                  |       |                  |       |                  |       |
|-------------|---------------------|---------------------|------------------|-------|------------------|-------|------------------|-------|
| Non-COPD    | 1,478/1,544 (95.7%) | 5,758/5,980 (96.3%) | 1                |       | 1                |       | 1                |       |
| Mild-COPD   | 43/1,544 (2.8%)     | 158/5,980 (2.6%)    | 1.06 (0.75-1.49) | 0.737 | 1.03 (0.72-1.48) | 0.866 | 0.94 (0.65-1.36) | 0.733 |
| Severe-COPD | 23/1,544 (1.5%)     | 64/5,980 (1.1%)     | 1.40 (0.87-2.26) | 0.169 | 1.17 (0.71-1.94) | 0.541 | 1.09 (0.65-1.82) | 0.741 |

**Total cholesterol < 200 mg/dL (n = 11,393)****Asthma**

|            |                     |                     |   |  |   |  |   |  |
|------------|---------------------|---------------------|---|--|---|--|---|--|
| Non-asthma | 2,109/2,325 (90.7%) | 8,324/9,068 (91.8%) | 1 |  | 1 |  | 1 |  |
|------------|---------------------|---------------------|---|--|---|--|---|--|

|                                                  |                     |                       |                  |        |                  |       |                  |       |
|--------------------------------------------------|---------------------|-----------------------|------------------|--------|------------------|-------|------------------|-------|
| Mild-asthma                                      | 190/2,325 (8.2%)    | 661/9,068 (7.3%)      | 1.14 (0.96-1.34) | 0.142  | 1.14 (0.96-1.36) | 0.145 | 1.12 (0.93-1.34) | 0.227 |
| Severe-asthma                                    | 26/2,325 (1.1%)     | 83/9,068 (0.9%)       | 1.24 (0.79-1.93) | 0.348  | 1.26 (0.80-1.99) | 0.327 | 1.19 (0.75-1.89) | 0.469 |
| <b>COPD</b>                                      |                     |                       |                  |        |                  |       |                  |       |
| Non-COPD                                         | 2,224/2,325 (95.7%) | 8,744/9,068 (96.4%)   | 1                |        | 1                |       | 1                |       |
| Mild-COPD                                        | 63/2,325 (2.7%)     | 228/9,068 (2.5%)      | 1.09 (0.82-1.44) | 0.566  | 1.12 (0.83-1.51) | 0.458 | 1.02 (0.83-1.26) | 0.841 |
| Severe-COPD                                      | 38/2,325 (1.6%)     | 96/9,068 (1.1%)       | 1.56 (1.07-2.27) | 0.022* | 1.46 (0.98-2.17) | 0.061 | 1.03 (0.55-1.90) | 0.938 |
| <b>Total cholesterol ≥ 200 mg/dL (n = 8,937)</b> |                     |                       |                  |        |                  |       |                  |       |
| <b>Asthma</b>                                    |                     |                       |                  |        |                  |       |                  |       |
| Non-asthma                                       | 1,595/1,741 (91.6%) | 6,643/7,196 (92.3%)   | 1                |        | 1                |       | 1                |       |
| Mild-asthma                                      | 132/1,741 (7.6%)    | 500/7,196 (6.9%)      | 1.10 (0.90-1.34) | 0.351  | 1.04 (0.84-1.28) | 0.733 | 1.08 (0.80-1.46) | 0.622 |
| Severe-asthma                                    | 14/1,741 (0.8%)     | 53/7,196 (0.7%)       | 1.10 (0.61-1.99) | 0.752  | 1.07 (0.58-1.96) | 0.830 | 1.40 (0.94-2.09) | 0.101 |
| <b>COPD</b>                                      |                     |                       |                  |        |                  |       |                  |       |
| Non-COPD                                         | 1,678/1,741 (96.4%) | 6,981/7,196 (97.0%)   | 1                |        | 1                |       | 1                |       |
| Mild-COPD                                        | 38/1,741 (2.2%)     | 131/7,196 (1.8%)      | 1.21 (0.84-1.74) | 0.313  | 1.17 (0.80-1.71) | 0.410 | 1.17 (0.79-1.71) | 0.436 |
| Severe-COPD                                      | 25/1,741 (1.4%)     | 84/7,196 (1.2%)       | 1.24 (0.79-1.94) | 0.352  | 1.16 (0.73-1.85) | 0.537 | 1.15 (0.72-1.85) | 0.554 |
| <b>CCI scores = 0 (n = 17,698)</b>               |                     |                       |                  |        |                  |       |                  |       |
| <b>Asthma</b>                                    |                     |                       |                  |        |                  |       |                  |       |
| Non-asthma                                       | 2,840/3,089 (91.9%) | 13,489/14,609 (92.3%) | 1                |        | 1                |       | 1                |       |
| Mild-asthma                                      | 219/3,089 (7.1%)    | 1004/14,609 (6.9%)    | 1.04 (0.89-1.21) | 0.647  | 1.05 (0.90-1.23) | 0.543 | 1.04 (0.89-1.22) | 0.634 |
| Severe-asthma                                    | 30/3,089 (1.0%)     | 116/14,609 (0.8%)     | 1.23 (0.82-1.84) | 0.318  | 1.20 (0.79-1.81) | 0.387 | 1.16 (0.76-1.75) | 0.497 |
| <b>COPD</b>                                      |                     |                       |                  |        |                  |       |                  |       |
| Non-COPD                                         | 2,990/3,089 (96.8%) | 14,172/14,609 (97.0%) | 1                |        | 1                |       | 1                |       |
| Mild-COPD                                        | 58/3,089 (1.9%)     | 298/14,609 (2.0%)     | 0.92 (0.69-1.23) | 0.578  | 1.03 (0.77-1.37) | 0.855 | 1.01 (0.76-1.36) | 0.939 |
| Severe-COPD                                      | 41/3,089 (1.3%)     | 139/14,609 (1.0%)     | 1.40 (0.99-1.99) | 0.061  | 1.37 (0.96-1.97) | 0.083 | 1.35 (0.94-1.93) | 0.108 |
| <b>CCI scores = 1 (n = 1,454)</b>                |                     |                       |                  |        |                  |       |                  |       |
| <b>Asthma</b>                                    |                     |                       |                  |        |                  |       |                  |       |
| Non-asthma                                       | 524/588 (89.1%)     | 782/866 (90.3%)       | 1                |        | 1                |       | 1                |       |
| Mild-asthma                                      | 57/588 (9.7%)       | 74/866 (8.5%)         | 1.15 (0.80-1.65) | 0.451  | 1.37 (0.93-2.01) | 0.401 | 1.28 (0.86-1.90) | 0.398 |
| Severe-asthma                                    | 7/588 (1.2%)        | 10/866 (1.2%)         | 1.05 (0.40-2.76) | 0.930  | 1.32 (0.48-3.69) | 0.109 | 1.14 (0.40-3.29) | 0.226 |

**COPD**

|             |                 |                 |                  |       |                  |       |                  |       |
|-------------|-----------------|-----------------|------------------|-------|------------------|-------|------------------|-------|
| Non-COPD    | 555/588 (94.4%) | 824/866 (95.2%) | 1                |       | 1                |       | 1                |       |
| Mild-COPD   | 22/588 (3.7%)   | 24/866 (2.8%)   | 1.36 (0.76-2.45) | 0.305 | 1.69 (0.91-3.12) | 0.399 | 1.52 (0.80-2.89) | 0.803 |
| Severe-COPD | 11/588 (1.9%)   | 18/866 (2.1%)   | 0.91 (0.43-1.94) | 0.801 | 1.21 (0.54-2.69) | 0.095 | 1.14 (0.51-2.57) | 0.204 |

**CCI scores  $\geq 2$  (n = 1,178)****Asthma**

|               |                 |                 |                  |       |                  |       |                  |       |
|---------------|-----------------|-----------------|------------------|-------|------------------|-------|------------------|-------|
| Non-asthma    | 340/389 (87.4%) | 696/789 (88.2%) | 1                |       | 1                |       | 1                |       |
| Mild-asthma   | 46/389 (11.8%)  | 83/789 (10.5%)  | 1.14 (0.77-1.66) | 0.518 | 1.16 (0.77-1.73) | 0.114 | 1.13 (0.74-1.72) | 0.114 |
| Severe-asthma | 3/389 (0.8%)    | 10/789 (1.3%)   | 0.61 (0.17-2.25) | 0.462 | 0.55 (0.15-2.09) | 0.424 | 0.52 (0.13-2.02) | 0.411 |

**COPD**

|             |                 |                 |                  |       |                  |       |                  |       |
|-------------|-----------------|-----------------|------------------|-------|------------------|-------|------------------|-------|
| Non-COPD    | 357/389 (91.8%) | 729/789 (92.4%) | 1                |       | 1                |       | 1                |       |
| Mild-COPD   | 21/389 (5.4%)   | 37/789 (4.7%)   | 1.16 (0.67-2.01) | 0.599 | 1.12 (0.63-1.98) | 0.146 | 1.15 (0.64-2.08) | 0.566 |
| Severe-COPD | 11/389 (2.8%)   | 23/789 (2.9%)   | 0.98 (0.47-2.03) | 0.949 | 1.07 (0.50-2.30) | 0.416 | 1.05 (0.48-2.32) | 0.344 |

**NSAID used < 6 times (n = 10,717)****Asthma**

|               |                     |                     |                  |       |                  |       |                  |       |
|---------------|---------------------|---------------------|------------------|-------|------------------|-------|------------------|-------|
| Non-asthma    | 1,871/1,972 (94.9%) | 8,318/8,745 (95.1%) | 1                |       | 1                |       | 1                |       |
| Mild-asthma   | 96/1,972 (4.9%)     | 376/8,745 (4.3%)    | 1.14 (0.90-1.43) | 0.280 | 1.16 (0.91-1.47) | 0.232 | 1.12 (0.88-1.43) | 0.364 |
| Severe-asthma | 05/1,972 (0.3%)     | 51/8,745 (0.6%)     | 0.44 (0.17-1.09) | 0.077 | 0.51 (0.20-1.30) | 0.161 | 0.48 (0.19-1.24) | 0.128 |

**COPD**

|             |                     |                     |                  |        |                  |        |                  |       |
|-------------|---------------------|---------------------|------------------|--------|------------------|--------|------------------|-------|
| Non-COPD    | 1,912/1,972 (97.0%) | 8,547/8,745 (97.7%) | 1                |        | 1                |        | 1                |       |
| Mild-COPD   | 35/1,972 (1.8%)     | 136/8,745 (1.6%)    | 1.15 (0.79-1.67) | 0.464  | 1.10 (0.74-1.63) | 0.641  | 1.04 (0.89-1.23) | 0.611 |
| Severe-COPD | 25/1,972 (1.3%)     | 62/8,745 (0.7%)     | 1.80 (1.13-2.88) | 0.013* | 1.66 (1.02-2.71) | 0.040* | 1.43 (0.94-2.18) | 0.092 |

**NSAID used  $\geq 6$  times (n = 9,613)****Asthma**

|               |                     |                     |                  |        |                  |       |                  |        |
|---------------|---------------------|---------------------|------------------|--------|------------------|-------|------------------|--------|
| Non-asthma    | 1,833/2,094 (87.5%) | 6,649/7,519 (88.4%) | 1                |        | 1                |       | 1                |        |
| Mild-asthma   | 226/2,094 (10.8%)   | 785/7,519 (10.4%)   | 1.04 (0.89-1.22) | 0.588  | 1.05 (0.89-1.24) | 0.543 | 1.10 (0.73-1.64) | 0.655  |
| Severe-asthma | 35/2,094 (1.7%)     | 85/7,519 (1.1%)     | 1.49 (1.01-2.22) | 0.047* | 1.47 (0.98-2.21) | 0.066 | 1.66 (1.02-2.72) | 0.042* |

**COPD**

|           |                     |                     |                  |       |                  |       |                  |       |
|-----------|---------------------|---------------------|------------------|-------|------------------|-------|------------------|-------|
| Non-COPD  | 1,990/2,094 (95.0%) | 7,178/7,519 (95.5%) | 1                |       | 1                |       | 1                |       |
| Mild-COPD | 66/2,094 (3.2%)     | 223/7,519 (3.0%)    | 1.07 (0.81-1.41) | 0.646 | 1.12 (0.84-1.49) | 0.455 | 1.07 (0.80-1.44) | 0.644 |

|                                     |                     |                       |                  |       |                  |        |                  |       |
|-------------------------------------|---------------------|-----------------------|------------------|-------|------------------|--------|------------------|-------|
| Severe-COPD                         | 38/2,094 (1.8%)     | 118/7,519 (1.6%)      | 1.16 (0.80-1.68) | 0.426 | 1.14 (0.78-1.68) | 0.496  | 1.09 (0.74-1.61) | 0.674 |
| Steroid used < 3 times (n = 11,308) |                     |                       |                  |       |                  |        |                  |       |
| Asthma                              |                     |                       |                  |       |                  |        |                  |       |
| Non-asthma                          | 2,101/2,206 (95.2%) | 8,676/9,102 (95.3%)   | 1                |       | 1                |        | 1                |       |
| Mild-asthma                         | 98/2,206 (4.4%)     | 405/9,102 (4.4%)      | 1.00 (0.80-1.25) | 0.995 | 0.97 (0.77-1.23) | 0.816  | 0.98 (0.78-1.24) | 0.879 |
| Severe-asthma                       | 7/2,206 (0.3%)      | 21/9,102 (0.2%)       | 1.38 (0.59-3.24) | 0.464 | 1.41 (0.59-3.37) | 0.439  | 1.45 (0.60-3.46) | 0.409 |
| COPD                                |                     |                       |                  |       |                  |        |                  |       |
| Non-COPD                            | 2,164/2,206 (98.1%) | 8,927/9,102 (98.1%)   | 1                |       | 1                |        | 1                |       |
| Mild-COPD                           | 31/2,206 (1.4%)     | 143/9,102 (1.6%)      | 0.89 (0.61-1.32) | 0.576 | 0.85 (0.57-1.28) | 0.445  | 0.85 (0.56-1.28) | 0.434 |
| Severe-COPD                         | 11/2,206 (0.5%)     | 32/9,102 (0.4%)       | 1.42 (0.71-2.82) | 0.318 | 1.26 (0.62-2.55) | 0.522  | 1.26 (0.62-2.56) | 0.515 |
| Steroid used ≥ 3 times (n = 9,022)  |                     |                       |                  |       |                  |        |                  |       |
| Asthma                              |                     |                       |                  |       |                  |        |                  |       |
| Non-asthma                          | 1,603/1,860 (86.2%) | 6,291/7,162 (87.8%)   | 1                |       | 1                |        | 1                |       |
| Mild-asthma                         | 224/1,860 (12.0%)   | 756/7,162 (10.6%)     | 1.16 (0.99-1.36) | 0.063 | 1.14 (0.96-1.34) | 0.131  | 1.10 (0.93-1.30) | 0.253 |
| Severe-asthma                       | 33/1,860 (1.8%)     | 115/7,162 (1.6%)      | 1.13 (0.76-1.67) | 0.551 | 1.12 (0.75-1.68) | 0.570  | 1.04 (0.69-1.57) | 0.858 |
| COPD                                |                     |                       |                  |       |                  |        |                  |       |
| Non-COPD                            | 1,738/1,860 (93.4%) | 6,798/7,162 (94.9%)   | 1                |       | 1                |        | 1                |       |
| Mild-COPD                           | 70/1,860 (3.8%)     | 216/7,162 (3.0%)      | 1.27 (0.96-1.67) | 0.091 | 1.28 (0.96-1.70) | 0.096  | 1.25 (0.93-1.67) | 0.140 |
| Severe-COPD                         | 52/1,860 (2.8%)     | 148/7,162 (2.1%)      | 1.38 (1.00-1.89) | 0.052 | 1.34 (0.96-1.87) | 0.086  | 1.31 (0.93-1.83) | 0.122 |
| Non-hypertension (n = 14,543)       |                     |                       |                  |       |                  |        |                  |       |
| Asthma                              |                     |                       |                  |       |                  |        |                  |       |
| Non-asthma                          | 2,662/2,878 (92.5%) | 10,868/11,665 (93.2%) | 1                |       | 1                |        | 1                |       |
| Mild-asthma                         | 194/2,878 (6.7%)    | 711/11,665 (6.1%)     | 1.11 (0.95-1.31) | 0.198 | 1.12 (0.94-1.32) | 0.200  | 1.09 (0.92-1.30) | 0.313 |
| Severe-asthma                       | 22/2,878 (0.8%)     | 86/11,665 (0.7%)      | 1.04 (0.65-1.67) | 0.856 | 1.11 (0.69-1.81) | 0.660  | 1.05 (0.65-1.71) | 0.832 |
| COPD                                |                     |                       |                  |       |                  |        |                  |       |
| Non-COPD                            | 2,784/2,878 (96.7%) | 11,367/11,665 (97.4%) | 1                |       | 1                |        | 1                |       |
| Mild-COPD                           | 55/2,878 (1.9%)     | 187/11,665 (1.6%)     | 1.20 (0.89-1.63) | 0.237 | 1.21 (0.88-1.65) | 0.245  | 1.18 (0.86-1.63) | 0.297 |
| Severe-COPD                         | 39/2,878 (1.4%)     | 111/11,665 (1.0%)     | 1.44 (0.99-2.07) | 0.054 | 1.48 (1.01-2.16) | 0.043* | 1.45 (0.99-2.12) | 0.058 |
| Hypertension (n = 5,787)            |                     |                       |                  |       |                  |        |                  |       |
| Asthma                              |                     |                       |                  |       |                  |        |                  |       |

|               |                     |                     |                  |       |                  |       |                  |       |
|---------------|---------------------|---------------------|------------------|-------|------------------|-------|------------------|-------|
| Non-asthma    | 1,042/1,188 (87.7%) | 4,099/4,599 (89.1%) | 1                |       | 1                |       | 1                |       |
| Mild-asthma   | 128/1,188 (10.8%)   | 450/4,599 (9.8%)    | 1.12 (0.91-1.38) | 0.289 | 1.08 (0.86-1.34) | 0.516 | 1.08 (0.86-1.35) | 0.520 |
| Severe-asthma | 18/1,188 (1.5%)     | 50/4,599 (1.1%)     | 1.42 (0.82-2.44) | 0.209 | 1.33 (0.76-2.34) | 0.321 | 1.33 (0.75-2.39) | 0.333 |
| <b>COPD</b>   |                     |                     |                  |       |                  |       |                  |       |
| Non-COPD      | 1,118/1,188 (94.1%) | 4,358/4,599 (94.8%) | 1                |       | 1                |       | 1                |       |
| Mild-COPD     | 46/1,188 (3.9%)     | 172/4,599 (3.7%)    | 1.04 (0.75-1.45) | 0.806 | 1.02 (0.72-1.45) | 0.898 | 0.97 (0.68-1.39) | 0.876 |
| Severe-COPD   | 24/1,188 (2.0%)     | 69/4,599 (1.5%)     | 1.36 (0.85-2.17) | 0.203 | 1.11 (0.67-1.82) | 0.691 | 1.06 (0.64-1.75) | 0.832 |

\* Conditional or unconditional logistic regression model, Significance at P < 0.05

† Stratified model for age, sex and income.

‡ Model 1 was adjusted for obesity, smoking, alcohol consumption, systolic blood pressure, diastolic blood pressure, fasting blood glucose, total cholesterol, CCI scores, number of NSAID used, number of steroid used, and hypertension.

§ Model 2 was adjusted for model 1 plus asthma and COPD.

**Table S2.** Subgroup analyses of crude and adjusted odds ratios of asthma and COPD for morbidity in COVID-19 participants by covariates

| Characteristics                 | Severe participants | Mild participants   | ORs (95% confidence interval) for morbidity |         |                  |         |                  |         |
|---------------------------------|---------------------|---------------------|---------------------------------------------|---------|------------------|---------|------------------|---------|
|                                 | (exposure/total, %) | (exposure/total, %) | Crude                                       | P-value | Model 1†         | P-value | Model 2‡         | P-value |
| Age < 60 years old ( n = 2,486) |                     |                     |                                             |         |                  |         |                  |         |
| Asthma                          |                     |                     |                                             |         |                  |         |                  |         |
| Non-asthma                      | 82/92 (89.1%)       | 2,235/2,394 (93.4%) | 1                                           |         | 1                |         | 1                |         |
| Mild-asthma                     | 10/92 (10.9%)       | 141/2,394 (5.9%)    | 1.93 (0.98-3.81)                            | 0.057   | 2.05 (1.01-4.18) | 0.047*  | 2.18 (1.06-4.50) | 0.035*  |
| Severe-asthma                   | 0/92 (0.0%)         | 18/2,394 (0.8%)     | N/A                                         |         | N/A              |         | N/A              |         |
| COPD                            |                     |                     |                                             |         |                  |         |                  |         |
| Non-COPD                        | 89/92 (96.7%)       | 2,335/2,394 (97.5%) | 1                                           |         | 1                |         | 1                |         |
| Mild-COPD                       | 1/92 (1.1%)         | 33/2,394 (1.4%)     | 0.80 (0.11-5.88)                            | 0.822   | 0.76 (0.10-5.74) | 0.788   | 0.53 (0.07-4.26) | 0.552   |
| Severe-COPD                     | 2/92 (2.2%)         | 26/2,394 (1.1%)     | 2.02 (0.47-8.64)                            | 0.344   | 1.98 (0.44-8.99) | 0.376   | 2.09 (0.46-9.53) | 0.341   |
| Age ≥ 60 years old (n = 1,580)  |                     |                     |                                             |         |                  |         |                  |         |
| Asthma                          |                     |                     |                                             |         |                  |         |                  |         |
| Non-asthma                      | 214/251 (85.3%)     | 1,173/1,329 (88.3%) | 1                                           |         | 1                |         | 1                |         |
| Mild-asthma                     | 33/251 (13.1%)      | 138/1,329 (10.4%)   | 1.31 (0.87-1.97)                            | 0.192   | 0.92 (0.58-1.47) | 0.723   | 0.83 (0.51-1.35) | 0.445   |
| Severe-asthma                   | 4/251 (1.6%)        | 18/1,329 (1.4%)     | 1.22 (0.41-3.63)                            | 0.724   | 0.61 (0.16-2.29) | 0.468   | 0.46 (0.11-1.87) | 0.278   |
| COPD                            |                     |                     |                                             |         |                  |         |                  |         |
| Non-COPD                        | 224/251 (89.2%)     | 1,254/1,329 (94.4%) | 1                                           |         | 1                |         | 1                |         |
| Mild-COPD                       | 14/251 (5.6%)       | 53/1,329 (4.0%)     | 1.48 (0.81-2.71)                            | 0.206   | 1.01 (0.50-2.04) | 0.982   | 1.16 (0.56-2.41) | 0.689   |
| Severe-COPD                     | 13/251 (5.2%)       | 22/1,329 (1.7%)     | 3.31 (1.64-6.66)                            | 0.001*  | 2.35 (1.02-5.41) | 0.045*  | 2.70 (1.14-6.42) | 0.024*  |
| Men (n = 1,526)                 |                     |                     |                                             |         |                  |         |                  |         |
| Asthma                          |                     |                     |                                             |         |                  |         |                  |         |
| Non-asthma                      | 181/204 (88.7%)     | 1,225/1,322 (92.7%) | 1                                           |         | 1                |         | 1                |         |
| Mild-asthma                     | 21/204 (10.3%)      | 85/1,322 (6.4%)     | 1.67 (1.01-2.76)                            | 0.045*  | 0.83 (0.46-1.49) | 0.531   | 0.70 (0.37-1.30) | 0.253   |

|                                  |                 |                     |                   |        |                   |        |                   |       |
|----------------------------------|-----------------|---------------------|-------------------|--------|-------------------|--------|-------------------|-------|
| Severe-asthma                    | 2/204 (1.0%)    | 12/1,322 (0.9%)     | 1.13 (0.25-5.08)  | 0.875  | 0.31 (0.04-2.34)  | 0.259  | 0.18 (0.02-1.53)  | 0.116 |
| <b>COPD</b>                      |                 |                     |                   |        |                   |        |                   |       |
| Non-COPD                         | 183/204 (89.7%) | 1,274/1,322 (96.4%) | 1                 |        | 1                 |        | 1                 |       |
| Mild-COPD                        | 12/204 (5.9%)   | 27/1,322 (2.0%)     | 3.09 (1.54-6.22)  | 0.002* | 1.78 (0.76-4.15)  | 0.181  | 2.30 (0.95-5.58)  | 0.066 |
| Severe-COPD                      | 9/204 (4.4%)    | 21/1,322 (1.6%)     | 2.98 (1.35-6.62)  | 0.007* | 1.63 (0.62-4.26)  | 0.322  | 2.03 (0.76-5.44)  | 0.159 |
| <b>Women (n = 2,540)</b>         |                 |                     |                   |        |                   |        |                   |       |
| <b>Asthma</b>                    |                 |                     |                   |        |                   |        |                   |       |
| Non-asthma                       | 115/139 (82.7%) | 2,183/2,401 (90.9%) | 1                 |        | 1                 |        | 1                 |       |
| Mild-asthma                      | 22/139 (15.8%)  | 194/2,401 (8.1%)    | 2.15 (1.33-3.48)  | 0.002* | 1.49 (0.87-2.54)  | 0.149  | 0.00 (0.00-0.00)  | 0.000 |
| Severe-asthma                    | 2/139 (1.4%)    | 24/2,401 (1.0%)     | 1.58 (0.37-6.78)  | 0.537  | 0.93 (0.19-4.57)  | 0.923  | 1.46 (0.84-2.56)  | 0.184 |
| <b>COPD</b>                      |                 |                     |                   |        |                   |        |                   |       |
| Non-COPD                         | 130/139 (93.5%) | 2,315/2,401 (96.4%) | 1                 |        | 1                 |        | 1                 |       |
| Mild-COPD                        | 3/139 (2.2%)    | 59/2,401 (2.5%)     | 0.91 (0.28-2.93)  | 0.868  | 0.42 (0.12-1.46)  | 0.171  | 0.37 (0.10-1.35)  | 0.133 |
| Severe-COPD                      | 6/139 (4.3%)    | 27/2,401 (1.1%)     | 3.96 (1.61-9.75)  | 0.003* | 3.11 (1.10-8.78)  | 0.032* | 2.71 (0.93-7.96)  | 0.069 |
| <b>Low income (n = 1,472)</b>    |                 |                     |                   |        |                   |        |                   |       |
| <b>Asthma</b>                    |                 |                     |                   |        |                   |        |                   |       |
| Non-asthma                       | 76/88 (86.4%)   | 1,267/1,384 (91.5%) | 1                 |        | 1                 |        | 1                 |       |
| Mild-asthma                      | 11/88 (12.5%)   | 105/1,384 (7.6%)    | 1.75 (0.90-3.39)  | 0.099  | 1.10 (0.51-2.39)  | 0.810  | 1.28 (0.58-2.83)  | 0.550 |
| Severe-asthma                    | 1/88 (0.0%)     | 12/1,384 (0.0%)     | 1.39 (0.18-10.83) | 0.754  | 1.98 (0.23-17.14) | 0.535  | 2.75 (0.27-28.34) | 0.396 |
| <b>COPD</b>                      |                 |                     |                   |        |                   |        |                   |       |
| Non-COPD                         | 82/88 (93.2%)   | 1,333/1,384 (96.3%) | 1                 |        | 1                 |        | 1                 |       |
| Mild-COPD                        | 1/88 (1.1%)     | 35/1,384 (2.5%)     | 0.46 (0.06-3.43)  | 0.452  | 0.16 (0.02-1.47)  | 0.106  | 0.13 (0.01-1.25)  | 0.078 |
| Severe-COPD                      | 5/88 (5.7%)     | 16/1,384 (1.2%)     | 5.08 (1.82-14.21) | 0.002* | 2.51 (0.69-9.10)  | 0.162  | 2.16 (0.57-8.09)  | 0.255 |
| <b>Middle income (n = 1,249)</b> |                 |                     |                   |        |                   |        |                   |       |
| <b>Asthma</b>                    |                 |                     |                   |        |                   |        |                   |       |
| Non-asthma                       | 93/110 (84.5%)  | 1,049/1,139 (92.1%) | 1                 |        | 1                 |        | 1                 |       |
| Mild-asthma                      | 15/110 (13.6%)  | 79/1,139 (6.9%)     | 2.14 (1.19-3.87)  | 0.012* | 1.56 (0.77-3.13)  | 0.215  | 1.47 (0.72-3.00)  | 0.291 |

|                                  |                 |                     |                     |        |                  |       |                  |        |
|----------------------------------|-----------------|---------------------|---------------------|--------|------------------|-------|------------------|--------|
| Severe-asthma                    | 2/110 (1.8%)    | 11/1,139 (1.0%)     | 2.05 (0.45-9.39)    | 0.355  | 0.30 (0.04-2.42) | 0.255 | 0.18 (0.02-1.99) | 0.161  |
| <b>COPD</b>                      |                 |                     |                     |        |                  |       |                  |        |
| Non-COPD                         | 101/110 (91.8%) | 1,105/1,139 (97.0%) | 1                   |        | 1                |       | 1                |        |
| Mild-COPD                        | 6/110 (5.5%)    | 20/1,139 (1.8%)     | 3.28 (1.29-8.36)    | 0.013* | 1.75 (0.50-6.14) | 0.381 | 2.16 (0.62-7.49) | 0.224  |
| Severe-COPD                      | 3/110 (2.7%)    | 14/1,139 (1.2%)     | 2.34 (0.66-8.29)    | 0.186  | 1.07 (0.20-5.73) | 0.941 | 1.10 (0.20-6.16) | 0.916  |
| <hr/>                            |                 |                     |                     |        |                  |       |                  |        |
| <b>High income (n = 1,345)</b>   |                 |                     |                     |        |                  |       |                  |        |
| <b>Asthma</b>                    |                 |                     |                     |        |                  |       |                  |        |
| Non-asthma                       | 127/145 (87.6%) | 1,092/1,200 (91.0%) | 1                   |        | 1                |       | 1                |        |
| Mild-asthma                      | 17/145 (11.7%)  | 95/1,200 (7.9%)     | 1.54 (0.89-2.66)    | 0.123  | 1.02 (0.54-1.92) | 0.961 | 0.90 (0.47-1.76) | 0.766  |
| Severe-asthma                    | 1/145 (0.7%)    | 13/1,200 (1.1%)     | 0.66 (0.09-5.10)    | 0.692  | 0.49 (0.05-4.40) | 0.523 | 0.32 (0.03-3.47) | 0.348  |
| <b>COPD</b>                      |                 |                     |                     |        |                  |       |                  |        |
| Non-COPD                         | 130/145 (89.7%) | 1,151/1,200 (95.9%) | 1                   |        | 1                |       | 1                |        |
| Mild-COPD                        | 8/145 (5.5%)    | 31/1,200 (2.6%)     | 2.29 (1.03-5.08)    | 0.042* | 1.28 (0.51-3.22) | 0.594 | 1.37 (0.53-3.52) | 0.518  |
| Severe-COPD                      | 7/145 (4.8%)    | 18/1,200 (1.5%)     | 3.45 (1.41-8.40)    | 0.007* | 2.88 (0.96-8.63) | 0.058 | 3.23 (1.06-9.88) | 0.040* |
| <hr/>                            |                 |                     |                     |        |                  |       |                  |        |
| <b>Underweight (n = 129)</b>     |                 |                     |                     |        |                  |       |                  |        |
| <b>Asthma</b>                    |                 |                     |                     |        |                  |       |                  |        |
| Non-asthma                       | 5/5 (100.0%)    | 114/124 (91.9%)     | 1                   |        | 1                |       | 1                |        |
| Mild-asthma                      | 0/5 (0.0%)      | 8/124 (6.5%)        | N/A                 |        | N/A              |       | N/A              |        |
| Severe-asthma                    | 0/5 (0.0%)      | 2/124 (1.6%)        | N/A                 |        | N/A              |       | N/A              |        |
| <b>COPD</b>                      |                 |                     |                     |        |                  |       |                  |        |
| Non-COPD                         | 4/05 (80.0%)    | 115/124 (92.7%)     | 1                   |        | 1                |       | 1                |        |
| Mild-COPD                        | 0/05 (0.0%)     | 8/124 (6.5%)        | N/A                 |        | N/A              |       | N/A              |        |
| Severe-COPD                      | 1/05 (20.0%)    | 1/124 (0.8%)        | 28.75 (1.51-546.90) | 0.025* | N/A              |       | N/A              |        |
| <hr/>                            |                 |                     |                     |        |                  |       |                  |        |
| <b>Normal weight (n = 1,458)</b> |                 |                     |                     |        |                  |       |                  |        |
| <b>Asthma</b>                    |                 |                     |                     |        |                  |       |                  |        |
| Non-asthma                       | 90/103 (87.4%)  | 1,249/1,355 (92.2%) | 1                   |        | 1                |       | 1                |        |
| Mild-asthma                      | 12/103 (11.7%)  | 94/1,355 (6.9%)     | 1.77 (0.94-3.35)    | 0.079  | 1.62 (0.78-3.38) | 0.197 | 1.78 (0.83-3.84) | 0.142  |

|                               |                 |                     |                   |         |                   |        |                   |        |
|-------------------------------|-----------------|---------------------|-------------------|---------|-------------------|--------|-------------------|--------|
| Severe-asthma                 | 1/103 (1.0%)    | 12/1,355 (0.9%)     | 1.16 (0.15-8.99)  | 0.890   | 0.28 (0.02-3.18)  | 0.302  | 0.33 (0.03-3.84)  | 0.372  |
| <b>COPD</b>                   |                 |                     |                   |         |                   |        |                   |        |
| Non-COPD                      | 95/103 (92.2%)  | 1,302/1,355 (96.1%) | 1                 |         | 1                 |        | 1                 |        |
| Mild-COPD                     | 4/103 (3.9%)    | 30/1,355 (2.2%)     | 1.83 (0.63-5.30)  | 0.267   | 0.64 (0.18-2.25)  | 0.482  | 0.56 (0.15-2.05)  | 0.379  |
| Severe-COPD                   | 4/103 (3.9%)    | 23/1,355 (1.7%)     | 2.39 (0.81-7.04)  | 0.115   | 1.05 (0.28-3.98)  | 0.948  | 1.07 (0.27-4.26)  | 0.927  |
| <hr/>                         |                 |                     |                   |         |                   |        |                   |        |
| <b>Overweight (n = 1,010)</b> |                 |                     |                   |         |                   |        |                   |        |
| <b>Asthma</b>                 |                 |                     |                   |         |                   |        |                   |        |
| Non-asthma                    | 66/70 (94.3%)   | 857/940 (91.2%)     | 1                 |         | 1                 |        | 1                 |        |
| Mild-asthma                   | 3/70 (4.3%)     | 74/940 (7.9%)       | 0.53 (0.16-1.72)  | 0.287   | 0.28 (0.08-1.02)  | 0.054  | 0.26 (0.07-1.03)  | 0.055  |
| Severe-asthma                 | 1/70 (1.4%)     | 9/940 (1.0%)        | 1.44 (0.18-11.56) | 0.730   | 0.94 (0.09-10.11) | 0.961  | 0.91 (0.06-13.77) | 0.944  |
| <b>COPD</b>                   |                 |                     |                   |         |                   |        |                   |        |
| Non-COPD                      | 66/70 (94.3%)   | 904/940 (96.2%)     | 1                 |         | 1                 |        | 1                 |        |
| Mild-COPD                     | 2/70 (2.9%)     | 25/940 (2.7%)       | 1.10 (0.25-4.73)  | 0.902   | 0.60 (0.12-2.96)  | 0.527  | 0.67 (0.12-3.66)  | 0.647  |
| Severe-COPD                   | 2/70 (2.9%)     | 11/940 (1.2%)       | 2.49 (0.54-11.47) | 0.241   | 0.95 (0.14-6.35)  | 0.960  | 1.53 (0.18-13.13) | 0.699  |
| <hr/>                         |                 |                     |                   |         |                   |        |                   |        |
| <b>Obese (n = 1,469)</b>      |                 |                     |                   |         |                   |        |                   |        |
| <b>Asthma</b>                 |                 |                     |                   |         |                   |        |                   |        |
| Non-asthma                    | 135/165 (81.8%) | 1,188/1,304 (91.1%) | 1                 |         | 1                 |        | 1                 |        |
| Mild-asthma                   | 28/165 (17.0%)  | 103/1,304 (7.9%)    | 2.39 (1.52-3.77)  | <0.001* | 1.68 (0.99-2.84)  | 0.056  | 1.56 (0.90-2.69)  | 0.115  |
| Severe-asthma                 | 2/165 (1.2%)    | 13/1,304 (1.0%)     | 1.35 (0.30-6.06)  | 0.692   | 0.97 (0.17-5.56)  | 0.971  | 0.84 (0.13-5.37)  | 0.857  |
| <b>COPD</b>                   |                 |                     |                   |         |                   |        |                   |        |
| Non-COPD                      | 148/165 (89.7%) | 1268/1,304 (97.2%)  | 1                 |         | 1                 |        | 1                 |        |
| Mild-COPD                     | 9/165 (5.5%)    | 23/1,304 (1.8%)     | 3.35 (1.52-7.38)  | 0.003*  | 1.87 (0.72-4.83)  | 0.199  | 1.66 (0.62-4.45)  | 0.317  |
| Severe-COPD                   | 8/165 (4.8%)    | 13/1,304 (1.0%)     | 5.28 (2.15-12.94) | <0.001* | 4.98 (1.66-14.93) | 0.004* | 4.79 (1.57-14.62) | 0.006* |
| <hr/>                         |                 |                     |                   |         |                   |        |                   |        |
| <b>Non-smoker (n = 3,181)</b> |                 |                     |                   |         |                   |        |                   |        |
| <b>Asthma</b>                 |                 |                     |                   |         |                   |        |                   |        |
| Non-asthma                    | 203/233 (87.1%) | 2,703/2,948 (91.7%) | 1                 |         | 1                 |        | 1                 |        |
| Mild-asthma                   | 27/233 (11.6%)  | 220/2,948 (7.5%)    | 1.63 (1.07-2.50)  | 0.023*  | 1.17 (0.73-1.89)  | 0.511  | 1.14 (0.69-1.87)  | 0.612  |

|                                                           |                 |                     |                  |         |                  |        |                  |        |
|-----------------------------------------------------------|-----------------|---------------------|------------------|---------|------------------|--------|------------------|--------|
| Severe-asthma                                             | 3/233 (1.3%)    | 25/2,948 (0.8%)     | 1.60 (0.48-5.34) | 0.446   | 1.08 (0.27-4.37) | 0.919  | 1.19 (0.30-4.78) | 0.803  |
| <b>COPD</b>                                               |                 |                     |                  |         |                  |        |                  |        |
| Non-COPD                                                  | 215/233 (92.3%) | 2,847/2,948 (96.6%) | 1                |         | 1                |        | 1                |        |
| Mild-COPD                                                 | 7/233 (3.0%)    | 65/2,948 (2.2%)     | 1.43 (0.65-3.15) | 0.380   | 0.69 (0.29-1.69) | 0.421  | 0.66 (0.26-1.65) | 0.370  |
| Severe-COPD                                               | 11/233 (4.7%)   | 36/2,948 (1.2%)     | 4.05 (2.03-8.06) | <0.001* | 2.55 (1.12-5.85) | 0.027* | 2.46 (1.06-5.70) | 0.037* |
| <b>Past or current smoker (n = 885)</b>                   |                 |                     |                  |         |                  |        |                  |        |
| <b>Asthma</b>                                             |                 |                     |                  |         |                  |        |                  |        |
| Non-asthma                                                | 93/110 (84.5%)  | 705/775 (91.0%)     | 1                |         | 1                |        | 1                |        |
| Mild-asthma                                               | 16/110 (14.5%)  | 59/775 (7.6%)       | 2.06 (1.14-3.72) | 0.017*  | 0.98 (0.47-2.04) | 0.958  | 0.83 (0.38-1.82) | 0.649  |
| Severe-asthma                                             | 1/110 (0.9%)    | 11/775 (1.4%)       | 0.69 (0.09-5.40) | 0.723   | 0.17 (0.02-1.93) | 0.154  | 0.10 (0.01-1.34) | 0.082  |
| <b>COPD</b>                                               |                 |                     |                  |         |                  |        |                  |        |
| Non-COPD                                                  | 98/110 (89.1%)  | 742/775 (95.7%)     | 1                |         | 1                |        | 1                |        |
| Mild-COPD                                                 | 8/110 (7.3%)    | 21/775 (2.7%)       | 2.89 (1.24-6.69) | 0.014*  | 1.66 (0.57-4.83) | 0.352  | 2.06 (0.66-6.37) | 0.211  |
| Severe-COPD                                               | 4/110 (3.6%)    | 12/775 (1.5%)       | 2.52 (0.80-7.98) | 0.115   | 1.21 (0.29-5.08) | 0.796  | 2.06 (0.46-9.35) | 0.348  |
| <b>Alcohol consumption &lt; 1 time a week (n = 2,968)</b> |                 |                     |                  |         |                  |        |                  |        |
| <b>Asthma</b>                                             |                 |                     |                  |         |                  |        |                  |        |
| Non-asthma                                                | 217/258 (84.1%) | 2,459/2,710 (90.7%) | 1                |         | 1                |        | 1                |        |
| Mild-asthma                                               | 38/258 (14.7%)  | 221/2,710 (8.2%)    | 1.95 (1.34-2.82) | <0.001* | 1.25 (0.81-1.93) | 0.321  | 1.19 (0.76-1.88) | 0.447  |
| Severe-asthma                                             | 3/258 (1.2%)    | 30/2,710 (1.1%)     | 1.13 (0.34-3.74) | 0.838   | 0.42 (0.10-1.73) | 0.230  | 0.38 (0.09-1.64) | 0.193  |
| <b>COPD</b>                                               |                 |                     |                  |         |                  |        |                  |        |
| Non-COPD                                                  | 234/258 (90.7%) | 2,608/2,710 (96.2%) | 1                |         | 1                |        | 1                |        |
| Mild-COPD                                                 | 11/258 (4.3%)   | 67/2,710 (2.5%)     | 1.83 (0.95-3.51) | 0.069   | 0.85 (0.39-1.83) | 0.671  | 0.91 (0.41-2.01) | 0.817  |
| Severe-COPD                                               | 13/258 (5.0%)   | 35/2,710 (1.3%)     | 4.14 (2.16-7.93) | <0.001* | 2.32 (1.04-5.18) | 0.040* | 2.38 (1.05-5.38) | 0.037* |
| <b>Alcohol consumption ≥1 time a week (n = 1,098)</b>     |                 |                     |                  |         |                  |        |                  |        |
| <b>Asthma</b>                                             |                 |                     |                  |         |                  |        |                  |        |
| Non-asthma                                                | 79/85 (92.9%)   | 949/1,013 (93.7%)   | 1                |         | 1                |        | 1                |        |
| Mild-asthma                                               | 5/85 (5.9%)     | 58/1,013 (5.7%)     | 1.04 (0.40-2.66) | 0.942   | 0.63 (0.22-1.78) | 0.380  | 0.51 (0.17-1.54) | 0.233  |

|                                                                                                    |                 |                     |                   |        |                     |        |                     |        |
|----------------------------------------------------------------------------------------------------|-----------------|---------------------|-------------------|--------|---------------------|--------|---------------------|--------|
| Severe-asthma                                                                                      | 1/85 (1.2%)     | 6/1,013 (0.6%)      | 2.00 (0.24-16.84) | 0.523  | 2.72 (0.28-26.22)   | 0.387  | 1.71 (0.15-19.84)   | 0.668  |
| <b>COPD</b>                                                                                        |                 |                     |                   |        |                     |        |                     |        |
| Non-COPD                                                                                           | 79/85 (92.9%)   | 981/1,013 (96.8%)   | 1                 |        | 1                   |        | 1                   |        |
| Mild-COPD                                                                                          | 4/85 (4.7%)     | 19/1,013 (1.9%)     | 2.62 (0.87-7.88)  | 0.087  | 1.87 (0.56-6.28)    | 0.311  | 2.31 (0.63-8.52)    | 0.208  |
| Severe-COPD                                                                                        | 2/85 (2.4%)     | 13/1,013 (1.3%)     | 1.91 (0.42-8.62)  | 0.400  | 1.80 (0.34-9.36)    | 0.487  | 1.81 (0.33-9.91)    | 0.497  |
| <b>Systolic blood pressure &lt; 140 mmHg and diastolic blood pressure &lt; 90 mmHg (n = 3,530)</b> |                 |                     |                   |        |                     |        |                     |        |
| <b>Asthma</b>                                                                                      |                 |                     |                   |        |                     |        |                     |        |
| Non-asthma                                                                                         | 231/268 (86.2%) | 2,987/3,262 (91.6%) | 1                 |        | 1                   |        | 1                   |        |
| Mild-asthma                                                                                        | 34/268 (12.7%)  | 246/3,262 (7.5%)    | 1.79 (1.22-2.62)  | 0.003* | 1.13 (0.73-1.76)    | 0.587  | 1.08 (0.68-1.72)    | 0.732  |
| Severe-asthma                                                                                      | 3/268 (1.1%)    | 29/3,262 (0.9%)     | 1.34 (0.40-4.42)  | 0.634  | 0.37 (0.08-1.68)    | 0.198  | 0.32 (0.07-1.56)    | 0.158  |
| <b>COPD</b>                                                                                        |                 |                     |                   |        |                     |        |                     |        |
| Non-COPD                                                                                           | 246/268 (91.8%) | 3,149/3,262 (96.5%) | 1                 |        | 1                   |        | 1                   |        |
| Mild-COPD                                                                                          | 12/268 (4.5%)   | 69/3,262 (2.1%)     | 2.23 (1.19-4.17)  | 0.012* | 1.10 (0.52-2.30)    | 0.804  | 1.20 (0.56-2.56)    | 0.633  |
| Severe-COPD                                                                                        | 10/268 (3.7%)   | 44/3,262 (1.3%)     | 2.91 (1.45-5.85)  | 0.003* | 1.24 (0.53-2.91)    | 0.615  | 1.34 (0.57-3.17)    | 0.506  |
| <b>Systolic blood pressure ≥ 140 mmHg or diastolic blood pressure ≥ 90 mmHg (n = 536)</b>          |                 |                     |                   |        |                     |        |                     |        |
| <b>Asthma</b>                                                                                      |                 |                     |                   |        |                     |        |                     |        |
| Non-asthma                                                                                         | 65/75 (86.7%)   | 421/461 (91.3%)     | 1                 |        | 1                   |        | 1                   |        |
| Mild-asthma                                                                                        | 9/75 (12.0%)    | 33/461 (7.2%)       | 1.77 (0.81-3.86)  | 0.154  | 1.07 (0.42-2.77)    | 0.886  | 1.15 (0.42-3.16)    | 0.791  |
| Severe-asthma                                                                                      | 1/75 (1.3%)     | 7/461 (1.5%)        | 0.93 (0.11-7.64)  | 0.943  | 1.59 (0.15-17.24)   | 0.704  | 1.09 (0.09-13.52)   | 0.950  |
| <b>COPD</b>                                                                                        |                 |                     |                   |        |                     |        |                     |        |
| Non-COPD                                                                                           | 67/75 (89.3%)   | 440/461 (95.4%)     | 1                 |        | 1                   |        | 1                   |        |
| Mild-COPD                                                                                          | 3/75 (4.0%)     | 17/461 (3.7%)       | 1.16 (0.33-4.06)  | 0.818  | 0.72 (0.15-3.39)    | 0.681  | 0.68 (0.14-3.43)    | 0.642  |
| Severe-COPD                                                                                        | 5/75 (6.7%)     | 4/461 (0.9%)        | 8.21 (2.15-31.34) | 0.002* | 22.32 (3.28-152.00) | 0.002* | 22.24 (3.11-158.94) | 0.002* |
| <b>Fasting blood glucose &lt; 100 mg/dL (n = 2,522)</b>                                            |                 |                     |                   |        |                     |        |                     |        |
| <b>Asthma</b>                                                                                      |                 |                     |                   |        |                     |        |                     |        |
| Non-asthma                                                                                         | 130/153 (85.0%) | 2,179/2,369 (92.0%) | 1                 |        | 1                   |        | 1                   |        |
| Mild-asthma                                                                                        | 21/153 (13.7%)  | 171/2,369 (7.2%)    | 2.06 (1.27-3.35)  | 0.004* | 1.18 (0.67-2.09)    | 0.561  | 1.09 (0.60-1.96)    | 0.785  |

|                                                      |                 |                     |                  |         |                  |        |                  |        |
|------------------------------------------------------|-----------------|---------------------|------------------|---------|------------------|--------|------------------|--------|
| Severe-asthma                                        | 2/153 (1.3%)    | 19/2,369 (0.8%)     | 1.76 (0.41-7.66) | 0.448   | 1.01 (0.19-5.28) | 0.990  | 0.76 (0.13-4.53) | 0.765  |
| <b>COPD</b>                                          |                 |                     |                  |         |                  |        |                  |        |
| Non-COPD                                             | 139/153 (90.8%) | 2,285/2,369 (96.5%) | 1                |         | 1                |        | 1                |        |
| Mild-COPD                                            | 7/153 (4.6%)    | 51/2,369 (2.2%)     | 2.26 (1.01-5.06) | 0.049*  | 1.32 (0.52-3.35) | 0.564  | 1.29 (0.50-3.36) | 0.596  |
| Severe-COPD                                          | 7/153 (4.6%)    | 33/2,369 (1.4%)     | 3.49 (1.52-8.02) | 0.003*  | 1.92 (0.68-5.41) | 0.218  | 1.95 (0.66-5.78) | 0.229  |
| <b>Fasting blood glucose ≥ 100 mg/dL (n = 1,544)</b> |                 |                     |                  |         |                  |        |                  |        |
| <b>Asthma</b>                                        |                 |                     |                  |         |                  |        |                  |        |
| Non-asthma                                           | 166/190 (87.4%) | 1,229/1,354 (90.8%) | 1                |         | 1                |        | 1                |        |
| Mild-asthma                                          | 22/190 (11.6%)  | 108/1,354 (8.0%)    | 1.51 (0.93-2.45) | 0.098   | 1.03 (0.58-1.80) | 0.931  | 1.01 (0.56-1.81) | 0.977  |
| Severe-asthma                                        | 2/190 (1.1%)    | 17/1,354 (1.3%)     | 0.87 (0.20-3.80) | 0.854   | 0.30 (0.05-1.85) | 0.194  | 0.30 (0.05-2.01) | 0.215  |
| <b>COPD</b>                                          |                 |                     |                  |         |                  |        |                  |        |
| Non-COPD                                             | 174/190 (91.6%) | 1,304/1,354 (96.3%) | 1                |         | 1                |        | 1                |        |
| Mild-COPD                                            | 8/190 (4.2%)    | 35/1,354 (2.6%)     | 1.71 (0.78-3.75) | 0.179   | 0.80 (0.32-1.99) | 0.624  | 0.97 (0.37-2.53) | 0.950  |
| Severe-COPD                                          | 8/190 (4.2%)    | 15/1,354 (1.1%)     | 4.00 (1.67-9.57) | 0.002*  | 2.15 (0.77-6.03) | 0.146  | 2.23 (0.78-6.31) | 0.133  |
| <b>Total cholesterol &lt; 200 mg/dL (n = 2,325)</b>  |                 |                     |                  |         |                  |        |                  |        |
| <b>Asthma</b>                                        |                 |                     |                  |         |                  |        |                  |        |
| Non-asthma                                           | 186/220 (84.5%) | 1,923/2,105 (91.4%) | 1                |         | 1                |        | 1                |        |
| Mild-asthma                                          | 32/220 (14.5%)  | 158/2,105 (7.5%)    | 2.09 (1.39-3.15) | <0.001* | 1.40 (0.87-2.25) | 0.169  | 1.34 (0.82-2.21) | 0.245  |
| Severe-asthma                                        | 2/220 (0.9%)    | 24/2,105 (1.1%)     | 0.86 (0.20-3.67) | 0.840   | 0.32 (0.06-1.68) | 0.177  | 0.27 (0.05-1.56) | 0.142  |
| <b>COPD</b>                                          |                 |                     |                  |         |                  |        |                  |        |
| Non-COPD                                             | 198/220 (90.0%) | 2,026/2,105 (96.2%) | 1                |         | 1                |        | 1                |        |
| Mild-COPD                                            | 10/220 (4.5%)   | 53/2,105 (2.5%)     | 1.93 (0.97-3.85) | 0.062   | 0.84 (0.37-1.88) | 0.666  | 0.87 (0.38-2.03) | 0.754  |
| Severe-COPD                                          | 12/220 (5.5%)   | 26/2,105 (1.2%)     | 4.72 (2.35-9.51) | <0.001* | 2.45 (1.02-5.85) | 0.045* | 2.53 (1.04-6.14) | 0.040* |
| <b>Total cholesterol ≥ 200 mg/dL (n = 1,741)</b>     |                 |                     |                  |         |                  |        |                  |        |
| <b>Asthma</b>                                        |                 |                     |                  |         |                  |        |                  |        |
| Non-asthma                                           | 110/123 (89.4%) | 1,485/1,618 (91.8%) | 1                |         | 1                |        | 1                |        |
| Mild-asthma                                          | 11/123 (8.9%)   | 121/1,618 (7.5%)    | 1.23 (0.64-2.34) | 0.535   | 0.76 (0.36-1.60) | 0.465  | 0.72 (0.33-1.54) | 0.393  |

|                                   |                 |                     |                   |        |                   |       |                   |       |
|-----------------------------------|-----------------|---------------------|-------------------|--------|-------------------|-------|-------------------|-------|
| Severe-asthma                     | 2/123 (1.6%)    | 12/1,618 (0.7%)     | 2.25 (0.50-10.18) | 0.292  | 1.59 (0.23-11.01) | 0.637 | 1.36 (0.18-10.16) | 0.765 |
| <b>COPD</b>                       |                 |                     |                   |        |                   |       |                   |       |
| Non-COPD                          | 115/123 (93.5%) | 1,563/1,618 (96.6%) | 1                 |        | 1                 |       | 1                 |       |
| Mild-COPD                         | 5/123 (4.1%)    | 33/1,618 (2.0%)     | 2.06 (0.79-5.38)  | 0.140  | 1.25 (0.39-3.95)  | 0.710 | 1.32 (0.41-4.28)  | 0.643 |
| Severe-COPD                       | 3/123 (2.4%)    | 22/1,618 (1.4%)     | 1.85 (0.55-6.28)  | 0.322  | 1.55 (0.40-5.96)  | 0.525 | 1.61 (0.41-6.36)  | 0.497 |
| <b>CCI scores = 0 (n = 3,089)</b> |                 |                     |                   |        |                   |       |                   |       |
| <b>Asthma</b>                     |                 |                     |                   |        |                   |       |                   |       |
| Non-asthma                        | 143/164 (87.2%) | 2,697/2,925 (92.2%) | 1                 |        | 1                 |       | 1                 |       |
| Mild-asthma                       | 21/164 (12.8%)  | 198/2,925 (6.8%)    | 2.00 (1.24-3.23)  | 0.005* | 1.49 (0.87-2.56)  | 0.144 | 1.43 (0.82-2.49)  | 0.204 |
| Severe-asthma                     | 0/164 (0.0%)    | 30/2,925 (1.0%)     | N/A               |        | N/A               |       | N/A               |       |
| <b>COPD</b>                       |                 |                     |                   |        |                   |       |                   |       |
| Non-COPD                          | 153/164 (93.3%) | 2,837/2,925 (97.0%) | 1                 |        | 1                 |       | 1                 |       |
| Mild-COPD                         | 4/164 (2.4%)    | 54/2,925 (1.8%)     | 1.37 (0.49-3.84)  | 0.545  | 1.06 (0.34-3.24)  | 0.925 | 0.99 (0.32-3.12)  | 0.988 |
| Severe-COPD                       | 7/164 (4.3%)    | 34/2,925 (1.2%)     | 3.82 (1.67-8.75)  | 0.002* | 2.17 (0.78-6.08)  | 0.140 | 2.74 (0.98-7.63)  | 0.054 |
| <b>CCI scores = 1 (n = 588)</b>   |                 |                     |                   |        |                   |       |                   |       |
| <b>Asthma</b>                     |                 |                     |                   |        |                   |       |                   |       |
| Non-asthma                        | 77/91 (84.6%)   | 447/497 (89.9%)     | 1                 |        | 1                 |       | 1                 |       |
| Mild-asthma                       | 12/91 (13.2%)   | 45/497 (9.1%)       | 1.55 (0.78-3.06)  | 0.209  | 0.95 (0.45-2.03)  | 0.255 | 0.88 (0.39-1.97)  | 0.279 |
| Severe-asthma                     | 2/91 (2.2%)     | 5/497 (1.0%)        | 2.32 (0.44-12.18) | 0.319  | 2.20 (0.35-13.76) | 0.903 | 1.84 (0.28-12.23) | 0.758 |
| <b>COPD</b>                       |                 |                     |                   |        |                   |       |                   |       |
| Non-COPD                          | 85/91 (93.4%)   | 470/497 (94.6%)     | 1                 |        | 1                 |       | 1                 |       |
| Mild-COPD                         | 3/91 (3.3%)     | 19/497 (3.8%)       | 0.87 (0.25-3.02)  | 0.830  | 0.80 (0.20-3.18)  | 0.255 | 0.77 (0.18-3.37)  | 0.528 |
| Severe-COPD                       | 3/91 (3.3%)     | 8/497 (1.6%)        | 2.07 (0.54-7.97)  | 0.289  | 4.06 (0.83-19.80) | 0.750 | 3.89 (0.75-20.26) | 0.733 |
| <b>CCI scores ≥ 2 (n = 389)</b>   |                 |                     |                   |        |                   |       |                   |       |
| <b>Asthma</b>                     |                 |                     |                   |        |                   |       |                   |       |
| Non-asthma                        | 76/88 (86.4%)   | 264/301 (87.7%)     | 1                 |        | 1                 |       | 1                 |       |
| Mild-asthma                       | 10/88 (11.4%)   | 36/301 (12.0%)      | 0.97 (0.46-2.03)  | 0.925  | 0.48 (0.18-1.29)  | 0.933 | 0.46 (0.17-1.28)  | 0.997 |

|                                              |                 |                     |                   |         |                   |        |                   |        |
|----------------------------------------------|-----------------|---------------------|-------------------|---------|-------------------|--------|-------------------|--------|
| Severe-asthma                                | 2/88 (2.3%)     | 1/301 (0.3%)        | 6.94 (0.62-77.51) | 0.116   | 1.17 (0.03-45.02) | 0.015* | 1.22 (0.03-56.33) | 0.015* |
| <b>COPD</b>                                  |                 |                     |                   |         |                   |        |                   |        |
| Non-COPD                                     | 125/135 (92.6%) | 1,746/1,837 (95.0%) | 1                 |         | 1                 |        | 1                 |        |
| Mild-COPD                                    | 10/135 (7.4%)   | 86/1,837 (4.7%)     | 1.62 (0.82-3.20)  | 0.162   | 1.03 (0.47-2.27)  | 0.937  | 0.88 (0.37-2.07)  | 0.772  |
| Severe-COPD                                  | 0/135 (0.0%)    | 5/1,837 (0.3%)      | N/A               |         | N/A               |        | N/A               |        |
| <b>NSAID used &lt; 6 times (n = 1,972)</b>   |                 |                     |                   |         |                   |        |                   |        |
| <b>Asthma</b>                                |                 |                     |                   |         |                   |        |                   |        |
| Non-asthma                                   | 125/135 (92.6%) | 1,746/1,837 (95.0%) | 1                 |         | 1                 |        | 1                 |        |
| Mild-asthma                                  | 10/135 (7.4%)   | 86/1,837 (4.7%)     | 1.62 (0.82-3.20)  | 0.162   | 1.03 (0.47-2.27)  | 0.937  | 0.88 (0.37-2.07)  | 0.772  |
| Severe-asthma                                | 0/135 (0.0%)    | 5/1,837 (0.3%)      | N/A               |         | N/A               |        | N/A               |        |
| <b>COPD</b>                                  |                 |                     |                   |         |                   |        |                   |        |
| Non-COPD                                     | 124/135 (91.9%) | 1,788/1,837 (97.3%) | 1                 |         | 1                 |        | 1                 |        |
| Mild-COPD                                    | 4/135 (3.0%)    | 31/1,837 (1.7%)     | 1.86 (0.65-5.36)  | 0.250   | 0.90 (0.28-2.89)  | 0.860  | 0.99 (0.29-3.38)  | 0.990  |
| Severe-COPD                                  | 7/135 (5.2%)    | 18/1,837 (1.0%)     | 5.61 (2.30-13.68) | <0.001* | 4.93 (1.68-14.44) | 0.004* | 5.05 (1.71-14.95) | 0.003* |
| <b>NSAID used ≥ 6 times (n = 2,094)</b>      |                 |                     |                   |         |                   |        |                   |        |
| <b>Asthma</b>                                |                 |                     |                   |         |                   |        |                   |        |
| Non-asthma                                   | 171/208 (82.2%) | 1,662/1,886 (88.1%) | 1                 |         | 1                 |        | 1                 |        |
| Mild-asthma                                  | 33/208 (15.9%)  | 193/1,886 (10.2%)   | 1.66 (1.11-2.48)  | 0.013*  | 1.11 (0.70-1.77)  | 0.660  | 1.11 (0.69-1.78)  | 0.683  |
| Severe-asthma                                | 4/208 (1.9%)    | 31/1,886 (1.6%)     | 1.25 (0.44-3.60)  | 0.674   | 0.56 (0.15-2.05)  | 0.379  | 0.54 (0.14-2.09)  | 0.375  |
| <b>COPD</b>                                  |                 |                     |                   |         |                   |        |                   |        |
| Non-COPD                                     | 189/208 (90.9%) | 1,801/1,886 (95.5%) | 1                 |         | 1                 |        | 1                 |        |
| Mild-COPD                                    | 11/208 (5.3%)   | 55/1,886 (2.9%)     | 1.91 (0.98-3.70)  | 0.057   | 0.94 (0.41-2.12)  | 0.872  | 0.98 (0.42-2.27)  | 0.964  |
| Severe-COPD                                  | 8/208 (3.8%)    | 30/1,886 (1.6%)     | 2.54 (1.15-5.62)  | 0.021*  | 1.11 (0.41-2.99)  | 0.831  | 1.18 (0.43-3.24)  | 0.745  |
| <b>Steroid used &lt; 3 times (n = 2,206)</b> |                 |                     |                   |         |                   |        |                   |        |
| <b>Asthma</b>                                |                 |                     |                   |         |                   |        |                   |        |
| Non-asthma                                   | 138/144 (95.8%) | 1,963/2,062 (95.2%) | 1                 |         | 1                 |        | 1                 |        |
| Mild-asthma                                  | 6/144 (4.2%)    | 92/2,062 (4.5%)     | 0.93 (0.40-2.16)  | 0.862   | 0.67 (0.27-1.66)  | 0.391  | 0.62 (0.24-1.59)  | 0.319  |

|                                           |                 |                     |                   |        |                  |        |                  |        |
|-------------------------------------------|-----------------|---------------------|-------------------|--------|------------------|--------|------------------|--------|
| Severe-asthma                             | 0/144 (0.0%)    | 07/2,062 (0.3%)     | N/A               |        | N/A              |        | N/A              |        |
| <b>COPD</b>                               |                 |                     |                   |        |                  |        |                  |        |
| Non-COPD                                  | 139/144 (96.5%) | 2,025/2,062 (98.2%) | 1                 |        | 1                |        | 1                |        |
| Mild-COPD                                 | 3/144 (2.1%)    | 28/2,062 (1.4%)     | 1.56 (0.47-5.20)  | 0.468  | 1.41 (0.38-5.17) | 0.605  | 1.59 (0.42-5.99) | 0.492  |
| Severe-COPD                               | 2/144 (1.4%)    | 9/2,062 (0.4%)      | 3.24 (0.69-15.13) | 0.135  | 1.19 (0.19-7.40) | 0.853  | 1.53 (0.23-9.99) | 0.660  |
| <b>Steroid used ≥ 3 times (n = 1,860)</b> |                 |                     |                   |        |                  |        |                  |        |
| <b>Asthma</b>                             |                 |                     |                   |        |                  |        |                  |        |
| Non-asthma                                | 158/199 (79.4%) | 1,445/1,661 (87.0%) | 1                 |        | 1                |        | 1                |        |
| Mild-asthma                               | 37/199 (18.6%)  | 187/1,661 (11.3%)   | 1.81 (1.23-2.67)  | 0.003* | 1.34 (0.85-2.13) | 0.213  | 1.31 (0.82-2.11) | 0.262  |
| Severe-asthma                             | 4/199 (2.0%)    | 29/1,661 (1.7%)     | 1.26 (0.44-3.64)  | 0.667  | 0.51 (0.14-1.83) | 0.300  | 0.45 (0.12-1.70) | 0.238  |
| <b>COPD</b>                               |                 |                     |                   |        |                  |        |                  |        |
| Non-COPD                                  | 174/199 (87.4%) | 1,564/1,661 (94.2%) | 1                 |        | 1                |        | 1                |        |
| Mild-COPD                                 | 12/199 (6.0%)   | 58/1,661 (3.5%)     | 1.86 (0.98-3.53)  | 0.619  | 0.82 (0.38-1.79) | 0.376  | 0.84 (0.38-1.89) | 0.678  |
| Severe-COPD                               | 13/199 (6.5%)   | 39/1,661 (2.3%)     | 3.00 (1.57-5.72)  | 0.001* | 2.52 (1.14-5.54) | 0.022* | 2.61 (1.17-5.81) | 0.019* |
| <b>Non-hypertension (n = 2,878)</b>       |                 |                     |                   |        |                  |        |                  |        |
| <b>Asthma</b>                             |                 |                     |                   |        |                  |        |                  |        |
| Non-asthma                                | 147/165 (89.1%) | 2,515/2,713 (92.7%) | 1                 |        | 1                |        | 1                |        |
| Mild-asthma                               | 18/165 (10.9%)  | 176/2,713 (6.5%)    | 1.75 (1.05-2.92)  | 0.033  | 1.23 (0.69-2.19) | 0.492  | 1.26 (0.69-2.29) | 0.447  |
| Severe-asthma                             | 0/165 (0.0%)    | 22/2,713 (0.8%)     | N/A               |        | N/A              |        | N/A              |        |
| <b>COPD</b>                               |                 |                     |                   |        |                  |        |                  |        |
| Non-COPD                                  | 157/165 (95.2%) | 2,627/2,713 (96.8%) | 1                 |        | 1                |        | 1                |        |
| Mild-COPD                                 | 5/165 (3.0%)    | 50/2,713 (1.8%)     | 1.67 (0.66-4.26)  | 0.280  | 1.04 (0.36-2.96) | 0.946  | 0.95 (0.32-2.77) | 0.919  |
| Severe-COPD                               | 3/165 (1.8%)    | 36/2,713 (1.3%)     | 1.39 (0.43-4.58)  | 0.584  | 0.59 (0.14-2.40) | 0.459  | 0.65 (0.15-2.78) | 0.556  |
| <b>Hypertension (n = 1,188)</b>           |                 |                     |                   |        |                  |        |                  |        |
| <b>Asthma</b>                             |                 |                     |                   |        |                  |        |                  |        |
| Non-asthma                                | 149/178 (83.7%) | 893/1,010 (88.4%)   | 1                 |        | 1                |        | 1                |        |
| Mild-asthma                               | 25/178 (14.0%)  | 103/1,010 (10.2%)   | 1.46 (0.91-2.33)  | 0.118  | 1.03 (0.60-1.76) | 0.930  | 0.92 (0.52-1.62) | 0.764  |

|                   |                 |                   |                   |         |                   |        |                   |        |
|-------------------|-----------------|-------------------|-------------------|---------|-------------------|--------|-------------------|--------|
| Severe-<br>asthma | 4/178 (2.2%)    | 14/1,010 (1.4%)   | 1.71 (0.56-5.27)  | 0.349   | 0.90 (0.24-3.40)  | 0.881  | 0.72 (0.17-2.99)  | 0.650  |
| <b>COPD</b>       |                 |                   |                   |         |                   |        |                   |        |
| Non-COPD          | 156/178 (87.6%) | 962/1,010 (95.2%) | 1                 |         | 1                 |        | 1                 |        |
| Mild-COPD         | 10/178 (5.6%)   | 36/1,010 (3.6%)   | 1.71 (0.83-3.52)  | 0.143   | 0.87 (0.38-2.00)  | 0.746  | 0.95 (0.39-2.29)  | 0.904  |
| Severe-<br>COPD   | 12/178 (6.7%)   | 12/1,010 (1.2%)   | 6.17 (2.72-13.97) | <0.001* | 4.36 (1.66-11.43) | 0.003* | 4.63 (1.71-12.54) | 0.003* |

\* Unconditional logistic regression model, Significance at  $P < 0.05$

† Model 1 was adjusted for age, sex, income, obesity, smoking, alcohol consumption, systolic blood pressure, diastolic blood pressure, fasting blood glucose, total cholesterol, CCI scores, number of NSAID used, number of steroid used and hypertension.

‡ Model 2 was adjusted for model 1 plus asthma and COPD.

**Table S3.** Subgroup analyses of crude and adjusted odd ratios of asthma and COPD for mortality in COVID-19 participants by covariates

| Characteristics                | Dead participants<br>(exposure/total, %) | Survived<br>participants<br>(exposure/total, %) | ORs (95% confidence interval) for mortality |         |                     |         |                     |         |
|--------------------------------|------------------------------------------|-------------------------------------------------|---------------------------------------------|---------|---------------------|---------|---------------------|---------|
|                                |                                          |                                                 | Crude                                       | P-value | Model 1†            | P-value | Model 2‡            | P-value |
| Age < 60 years old (n = 2,486) |                                          |                                                 |                                             |         |                     |         |                     |         |
| Asthma                         |                                          |                                                 |                                             |         |                     |         |                     |         |
| Non-asthma                     | 12/12 (100.0%)                           | 2,305/2,474 (93.2%)                             | 1                                           |         | 1                   |         | 1                   |         |
| Mild-asthma                    | 0/12 (0.0%)                              | 151/2,474 (6.1%)                                | N/A                                         |         | N/A                 |         | N/A                 |         |
| Severe-asthma                  | 0/12 (0.0%)                              | 18/2,474 (0.7%)                                 | N/A                                         |         | N/A                 |         | N/A                 |         |
| COPD                           |                                          |                                                 |                                             |         |                     |         |                     |         |
| Non-COPD                       | 11/12 (91.7%)                            | 2,413/2,474 (97.5%)                             | 1                                           |         | 1                   |         | 1                   |         |
| Mild-COPD                      | 0/12 (0.0%)                              | 34/2,474 (1.4%)                                 | N/A                                         |         | N/A                 |         | N/A                 |         |
| Severe-COPD                    | 1/12 (8.3%)                              | 27/2,474 (1.1%)                                 | 8.13 (1.01-65.16)                           | 0.049*  | 13.09 (0.87-196.11) | 0.063   | 32.84 (2.43-444.17) | 0.009*  |
| Age ≥ 60 years old (n = 1,580) |                                          |                                                 |                                             |         |                     |         |                     |         |
| Asthma                         |                                          |                                                 |                                             |         |                     |         |                     |         |
| Non-asthma                     | 96/120 (80.0%)                           | 1,291/1,460 (88.4%)                             | 1                                           |         | 1                   |         | 1                   |         |
| Mild-asthma                    | 20/120 (16.7%)                           | 151/1,460 (10.3%)                               | 1.78 (1.07-2.97)                            | 0.027*  | 1.07 (0.58-1.97)    | 0.837   | 0.93 (0.49-1.79)    | 0.838   |
| Severe-asthma                  | 4/120 (3.3%)                             | 18/1,460 (1.2%)                                 | 2.99 (0.99-9.01)                            | 0.052   | 1.10 (0.23-5.25)    | 0.910   | 0.73 (0.13-4.08)    | 0.722   |
| COPD                           |                                          |                                                 |                                             |         |                     |         |                     |         |
| Non-COPD                       | 102/120 (85.0%)                          | 1,376/1,460 (94.2%)                             | 1                                           |         | 1                   |         | 1                   |         |
| Mild-COPD                      | 9/120 (7.5%)                             | 58/1,460 (4.0%)                                 | 2.09 (1.01-4.35)                            | 0.047*  | 1.13 (0.45-2.85)    | 0.794   | 1.20 (0.45-3.19)    | 0.710   |
| Severe-COPD                    | 9/120 (7.5%)                             | 26/1,460 (1.8%)                                 | 4.67 (2.13-10.23)                           | 0.001*  | 2.73 (1.01-7.41)    | 0.049*  | 2.90 (1.02-8.26)    | 0.047*  |
| Men (n = 1,526)                |                                          |                                                 |                                             |         |                     |         |                     |         |
| Asthma                         |                                          |                                                 |                                             |         |                     |         |                     |         |
| Non-asthma                     | 74/91 (81.3%)                            | 1,332/1,435 (92.8%)                             | 1                                           |         | 1                   |         | 1                   |         |
| Mild-asthma                    | 15/91 (16.5%)                            | 91/1,435 (6.3%)                                 | 2.97 (1.64-5.38)                            | <0.001* | 1.22 (0.58-2.56)    | 0.605   | 0.97 (0.44-2.15)    | 0.945   |

|                                  |               |                     |                    |         |                     |        |                     |        |
|----------------------------------|---------------|---------------------|--------------------|---------|---------------------|--------|---------------------|--------|
| Severe-asthma                    | 2/91 (2.2%)   | 12/1,435 (0.8%)     | 3.00 (0.66-13.65)  | 0.155   | 0.27 (0.03-2.90)    | 0.282  | 0.13 (0.01-1.71)    | 0.121  |
| <b>COPD</b>                      |               |                     |                    |         |                     |        |                     |        |
| Non-COPD                         | 76/91 (83.5%) | 1,381/1,435 (96.2%) | 1                  |         | 1                   |        | 1                   |        |
| Mild-COPD                        | 9/91 (9.9%)   | 30/1,435 (2.1%)     | 5.45 (2.50-11.89)  | <0.001* | 2.30 (0.78-6.81)    | 0.133  | 2.67 (0.86-8.27)    | 0.090* |
| Severe-COPD                      | 6/91 (6.6%)   | 24/1,435 (1.7%)     | 4.54 (1.80-11.44)  | 0.001*  | 1.57 (0.47-5.20)    | 0.461  | 2.14 (0.61-7.51)    | 0.237  |
| <b>Women (n = 2,540)</b>         |               |                     |                    |         |                     |        |                     |        |
| <b>Asthma</b>                    |               |                     |                    |         |                     |        |                     |        |
| Non-asthma                       | 34/41 (82.9%) | 2,264/2,499 (90.6%) | 1                  |         | 1                   |        | 1                   |        |
| Mild-asthma                      | 5/41 (12.2%)  | 211/2,499 (8.4%)    | 1.58 (0.61-4.08)   | 0.346   | 0.52 (0.17-1.61)    | 0.258  | 0.39 (0.11-1.42)    | 0.155  |
| Severe-asthma                    | 2/41 (4.9%)   | 24/2,499 (1.0%)     | 5.55 (1.26-24.42)  | 0.023*  | 2.52 (0.40-15.97)   | 0.326  | 5.78 (0.82-40.67)   | 0.078  |
| <b>COPD</b>                      |               |                     |                    |         |                     |        |                     |        |
| Non-COPD                         | 37/41 (90.2%) | 2,408/2,499 (96.4%) | 1                  |         | 1                   |        | 1                   |        |
| Mild-COPD                        | 0/41 (0.0%)   | 62/2,499 (2.5%)     | N/A                |         | N/A                 |        | N/A                 |        |
| Severe-COPD                      | 4/41 (9.8%)   | 29/2,499 (1.2%)     | 8.98 (3.00-26.82)  | <0.001* | 5.74 (1.34-24.63)   | 0.019* | 8.26 (1.63-41.81)   | 0.011* |
| <b>Low income (n = 1,472)</b>    |               |                     |                    |         |                     |        |                     |        |
| <b>Asthma</b>                    |               |                     |                    |         |                     |        |                     |        |
| Non-asthma                       | 30/35 (85.7%) | 1,313/1,437 (91.4%) | 1                  |         | 1                   |        | 1                   |        |
| Mild-asthma                      | 4/35 (11.4%)  | 112/1,437 (7.8%)    | 1.56 (0.54-4.52)   | 0.409   | 0.56 (0.15-2.15)    | 0.397  | 0.61 (0.15-2.41)    | 0.479  |
| Severe-asthma                    | 1/35 (2.9%)   | 12/1,437 (0.8%)     | 3.65 (0.46-28.96)  | 0.221   | 11.09 (1.06-116.04) | 0.045* | 11.35 (0.69-187.10) | 0.089  |
| <b>COPD</b>                      |               |                     |                    |         |                     |        |                     |        |
| Non-COPD                         | 30/35 (85.7%) | 1,385/1,437 (96.4%) | 1                  |         | 1                   |        | 1                   |        |
| Mild-COPD                        | 1/35 (2.9%)   | 35/1,437 (2.4%)     | 1.32 (0.18-9.95)   | 0.788   | 0.24 (0.02-3.47)    | 0.297  | 0.23 (0.02-3.18)    | 0.272  |
| Severe-COPD                      | 4/35 (11.4%)  | 17/1,437 (1.2%)     | 10.87 (3.45-34.24) | <0.001* | 6.75 (1.26-36.05)   | 0.026* | 5.15 (0.90-29.67)   | 0.066  |
| <b>Middle income (n = 1,249)</b> |               |                     |                    |         |                     |        |                     |        |
| <b>Asthma</b>                    |               |                     |                    |         |                     |        |                     |        |
| Non-asthma                       | 31/40 (77.5%) | 1,111/1,209 (91.9%) | 1                  |         | 1                   |        | 1                   |        |
| Mild-asthma                      | 7/40 (17.5%)  | 87/1,209 (7.2%)     | 2.88 (1.23-6.74)   | 0.015*  | 1.15 (0.32-4.19)    | 0.834  | 1.22 (0.32-4.65)    | 0.771  |

|                                  |               |                     |                   |        |                   |       |                   |       |
|----------------------------------|---------------|---------------------|-------------------|--------|-------------------|-------|-------------------|-------|
| Severe-asthma                    | 2/40 (5.0%)   | 11/1,209 (0.9%)     | 6.52 (1.39-30.65) | 0.017* | 0.09 (0.01-1.46)  | 0.091 | 0.11 (0.00-3.49)  | 0.211 |
| <b>COPD</b>                      |               |                     |                   |        |                   |       |                   |       |
| Non-COPD                         | 35/40 (87.5%) | 1,171/1,209 (96.9%) | 1                 |        | 1                 |       | 1                 |       |
| Mild-COPD                        | 3/40 (7.5%)   | 23/1,209 (1.9%)     | 4.36 (1.25-15.22) | 0.021* | 0.36 (0.03-3.88)  | 0.397 | 0.89 (0.07-11.12) | 0.927 |
| Severe-COPD                      | 2/40 (5.0%)   | 15/1,209 (1.2%)     | 4.46 (0.98-20.26) | 0.053  | 0.34 (0.02-5.40)  | 0.444 | 0.61 (0.03-12.08) | 0.745 |
| <b>High income (n = 1,345)</b>   |               |                     |                   |        |                   |       |                   |       |
| <b>Asthma</b>                    |               |                     |                   |        |                   |       |                   |       |
| Non-asthma                       | 47/57 (82.5%) | 1,172/1,288 (91.0%) | 1                 |        | 1                 |       | 1                 |       |
| Mild-asthma                      | 9/57 (15.8%)  | 103/1,288 (8.0%)    | 2.18 (1.04-4.57)  | 0.039* | 1.19 (0.48-2.96)  | 0.705 | 0.97 (0.37-2.54)  | 0.944 |
| Severe-asthma                    | 1/57 (1.8%)   | 13/1,288 (1.0%)     | 1.92 (0.25-14.97) | 0.534  | 1.05 (0.10-11.55) | 0.968 | 0.60 (0.04-9.09)  | 0.711 |
| <b>COPD</b>                      |               |                     |                   |        |                   |       |                   |       |
| Non-COPD                         | 48/57 (84.2%) | 1,233/1,288 (95.7%) | 1                 |        | 1                 |       | 1                 |       |
| Mild-COPD                        | 5/57 (8.8%)   | 34/1,288 (2.6%)     | 3.78 (1.42-10.09) | 0.008* | 1.80 (0.54-6.00)  | 0.337 | 1.85 (0.53-6.51)  | 0.335 |
| Severe-COPD                      | 4/57 (7.0%)   | 21/1,288 (1.6%)     | 4.89 (1.62-14.81) | 0.005* | 3.02 (0.70-13.01) | 0.139 | 3.24 (0.71-14.73) | 0.128 |
| <b>Underweight (n = 129)</b>     |               |                     |                   |        |                   |       |                   |       |
| <b>Asthma</b>                    |               |                     |                   |        |                   |       |                   |       |
| Non-asthma                       | 3/3 (100.0%)  | 116/126 (92.1%)     | 1                 |        | 1                 |       | 1                 |       |
| Mild-asthma                      | 0/3 (0.0%)    | 8/126 (6.3%)        | N/A               |        | N/A               |       | N/A               |       |
| Severe-asthma                    | 0/3 (0.0%)    | 2/126 (1.6%)        | N/A               |        | N/A               |       | N/A               |       |
| <b>COPD</b>                      |               |                     |                   |        |                   |       |                   |       |
| Non-COPD                         | 2/03 (66.7%)  | 117/126 (92.9%)     | 1                 |        | 1                 |       | 1                 |       |
| Mild-COPD                        | 0/03 (0.0%)   | 8/126 (6.3%)        | N/A               |        | N/A               |       | N/A               |       |
| Severe-COPD                      | 1/03 (33.3%)  | 1/126 (0.8%)        | N/A               |        | N/A               |       | N/A               |       |
| <b>Normal weight (n = 1,458)</b> |               |                     |                   |        |                   |       |                   |       |
| <b>Asthma</b>                    |               |                     |                   |        |                   |       |                   |       |
| Non-asthma                       | 33/37 (89.2%) | 1,306/1,421 (91.9%) | 1                 |        | 1                 |       | 1                 |       |
| Mild-asthma                      | 3/37 (8.1%)   | 103/1,421 (7.2%)    | 1.15 (0.35-3.82)  | 0.816  | 0.74 (0.16-3.38)  | 0.701 | 1.00 (0.19-5.27)  | 0.996 |

|                               |               |                     |                   |         |                   |        |                   |        |
|-------------------------------|---------------|---------------------|-------------------|---------|-------------------|--------|-------------------|--------|
| Severe-asthma                 | 1/37 (2.7%)   | 12/1,421 (0.8%)     | 3.30 (0.42-26.11) | 0.258   | 0.06 (0.00-3.23)  | 0.169  | 0.10 (0.00-4.00)  | 0.220  |
| <b>COPD</b>                   |               |                     |                   |         |                   |        |                   |        |
| Non-COPD                      | 33/37 (89.2%) | 1,364/1,421 (96.0%) | 1                 |         | 1                 |        | 1                 |        |
| Mild-COPD                     | 2/37 (5.4%)   | 32/1,421 (2.3%)     | 2.58 (0.59-11.23) | 0.206   | 0.20 (0.02-2.07)  | 0.178  | 0.27 (0.03-2.61)  | 0.255  |
| Severe-COPD                   | 2/37 (5.4%)   | 25/1,421 (1.8%)     | 3.31 (0.75-14.54) | 0.113   | 0.66 (0.10-4.49)  | 0.667  | 1.21 (0.15-9.96)  | 0.861  |
| <b>Overweight (n = 1,010)</b> |               |                     |                   |         |                   |        |                   |        |
| <b>Asthma</b>                 |               |                     |                   |         |                   |        |                   |        |
| Non-asthma                    | 27/28 (96.4%) | 896/982 (91.2%)     | 1                 |         | 1                 |        | 1                 |        |
| Mild-asthma                   | 0/28 (0.0%)   | 77/982 (7.8%)       | N/A               |         | N/A               |        | N/A               |        |
| Severe-asthma                 | 1/28 (3.6%)   | 9/982 (0.9%)        | 3.69 (0.45-30.15) | 0.224   | 2.93 (0.19-45.86) | 0.444  | N/A               |        |
| <b>COPD</b>                   |               |                     |                   |         |                   |        |                   |        |
| Non-COPD                      | 25/28 (89.3%) | 945/982 (96.2%)     | 1                 |         | 1                 |        | 1                 |        |
| Mild-COPD                     | 1/28 (3.6%)   | 26/982 (2.6%)       | 1.45 (0.19-11.14) | 0.719   | 0.61 (0.05-6.93)  | 0.692  | 0.99 (0.06-16.10) | 0.997  |
| Severe-COPD                   | 2/28 (7.1%)   | 11/982 (1.1%)       | 6.87 (1.45-32.64) | 0.015*  | 3.22 (0.36-29.19) | 0.298  | N/A               |        |
| <b>Obese (n = 1,469)</b>      |               |                     |                   |         |                   |        |                   |        |
| <b>Asthma</b>                 |               |                     |                   |         |                   |        |                   |        |
| Non-asthma                    | 45/64 (70.3%) | 1,278/1,405 (91.0%) | 1                 |         | 1                 |        | 1                 |        |
| Mild-asthma                   | 17/64 (26.6%) | 114/1,405 (8.1%)    | 4.24 (2.35-7.64)  | <0.001* | 2.51 (1.20-5.28)  | 0.015* | 2.24 (1.03-4.88)  | 0.042* |
| Severe-asthma                 | 2/64 (3.1%)   | 13/1,405 (0.9%)     | 4.37 (0.96-19.94) | 0.057   | 3.35 (0.37-30.04) | 0.280  | 3.02 (0.30-31.00) | 0.352  |
| <b>COPD</b>                   |               |                     |                   |         |                   |        |                   |        |
| Non-COPD                      | 53/64 (82.8%) | 1,363/1,405 (97.0%) | 1                 |         | 1                 |        | 1                 |        |
| Mild-COPD                     | 6/64 (9.4%)   | 26/1,405 (1.9%)     | 5.94 (2.34-15.03) | <0.001* | 2.37 (0.66-8.45)  | 0.185  | 1.62 (0.41-6.39)  | 0.492  |
| Severe-COPD                   | 5/64 (7.8%)   | 16/1,405 (1.1%)     | 8.04 (2.84-22.76) | <0.001* | 7.07 (1.61-31.04) | 0.010* | 5.96 (1.31-27.02) | 0.021* |
| <b>Non-smoker (n = 3,181)</b> |               |                     |                   |         |                   |        |                   |        |
| <b>Asthma</b>                 |               |                     |                   |         |                   |        |                   |        |
| Non-asthma                    | 65/77 (84.4%) | 2,841/3,104 (91.5%) | 1                 |         | 1                 |        | 1                 |        |
| Mild-asthma                   | 9/77 (11.7%)  | 238/3,104 (7.7%)    | 1.65 (0.81-3.36)  | 0.165   | 0.74 (0.32-1.70)  | 0.475  | 0.70 (0.29-1.69)  | 0.427  |

|                                                           |                |                     |                   |         |                   |        |                   |        |
|-----------------------------------------------------------|----------------|---------------------|-------------------|---------|-------------------|--------|-------------------|--------|
| Severe-asthma                                             | 3/77 (3.9%)    | 25/3,104 (0.8%)     | 5.25 (1.55-17.81) | 0.008*  | 3.67 (0.68-19.96) | 0.132  | 4.61 (0.84-25.15) | 0.078  |
| <b>COPD</b>                                               |                |                     |                   |         |                   |        |                   |        |
| Non-COPD                                                  | 67/77 (87.0%)  | 2,995/3,104 (96.5%) | 1                 |         | 1                 |        | 1                 |        |
| Mild-COPD                                                 | 3/77 (3.9%)    | 69/3,104 (2.2%)     | 1.95 (0.60-6.33)  | 0.269   | 0.48 (0.11-2.08)  | 0.329  | 0.38 (0.07-1.96)  | 0.246  |
| Severe-COPD                                               | 7/77 (9.1%)    | 40/3,104 (1.3%)     | 7.82 (3.38-18.10) | <0.001* | 3.32 (1.04-10.56) | 0.042* | 3.53 (1.06-11.76) | 0.040* |
| <b>Past or current smoker (n = 885)</b>                   |                |                     |                   |         |                   |        |                   |        |
| <b>Asthma</b>                                             |                |                     |                   |         |                   |        |                   |        |
| Non-asthma                                                | 43/55 (78.2%)  | 755/830 (91.0%)     | 1                 |         | 1                 |        | 1                 |        |
| Mild-asthma                                               | 11/55 (20.0%)  | 64/830 (7.7%)       | 3.02 (1.48-6.14)  | 0.002*  | 1.14 (0.44-2.96)  | 0.783  | 0.83 (0.29-2.34)  | 0.717  |
| Severe-asthma                                             | 1/55 (1.8%)    | 11/830 (1.3%)       | 1.60 (0.20-12.65) | 0.658   | 0.10 (0.01-1.67)  | 0.108  | 0.04 (0.00-0.96)  | 0.047* |
| <b>COPD</b>                                               |                |                     |                   |         |                   |        |                   |        |
| Non-COPD                                                  | 46/55 (83.6%)  | 794/830 (95.7%)     | 1                 |         | 1                 |        | 1                 |        |
| Mild-COPD                                                 | 6/55 (10.9%)   | 23/830 (2.8%)       | 4.50 (1.75-11.60) | 0.002*  | 3.08 (0.76-12.59) | 0.117  | 4.00 (0.90-17.78) | 0.068  |
| Severe-COPD                                               | 3/55 (5.5%)    | 13/830 (1.6%)       | 3.98 (1.10-14.47) | 0.036*  | 0.98 (0.16-5.90)  | 0.984  | 2.40 (0.34-17.19) | 0.383  |
| <b>Alcohol consumption &lt; 1 time a week (n = 2,968)</b> |                |                     |                   |         |                   |        |                   |        |
| <b>Asthma</b>                                             |                |                     |                   |         |                   |        |                   |        |
| Non-asthma                                                | 92/112 (82.1%) | 2,584/2,856 (90.5%) | 1                 |         | 1                 |        | 1                 |        |
| Mild-asthma                                               | 17/112 (15.2%) | 242/2,856 (8.5%)    | 1.97 (1.16-3.37)  | 0.013*  | 0.86 (0.44-1.67)  | 0.659  | 0.79 (0.39-1.58)  | 0.496  |
| Severe-asthma                                             | 3/112 (2.7%)   | 30/2,856 (1.1%)     | 2.81 (0.84-9.37)  | 0.093   | 0.61 (0.11-3.41)  | 0.572  | 0.45 (0.07-2.90)  | 0.404  |
| <b>COPD</b>                                               |                |                     |                   |         |                   |        |                   |        |
| Non-COPD                                                  | 97/112 (86.6%) | 2,745/2,856 (96.1%) | 1                 |         | 1                 |        | 1                 |        |
| Mild-COPD                                                 | 7/112 (6.3%)   | 71/2,856 (2.5%)     | 2.79 (1.25-6.22)  | 0.012*  | 0.87 (0.30-2.51)  | 0.798  | 1.06 (0.35-3.19)  | 0.917  |
| Severe-COPD                                               | 8/112 (7.1%)   | 40/2,856 (1.4%)     | 5.66 (2.58-12.42) | <0.001* | 2.16 (0.76-6.20)  | 0.151  | 2.54 (0.85-7.58)  | 0.096  |
| <b>Alcohol consumption ≥1 time a week (n = 1,098)</b>     |                |                     |                   |         |                   |        |                   |        |
| <b>Asthma</b>                                             |                |                     |                   |         |                   |        |                   |        |
| Non-asthma                                                | 16/20 (80.0%)  | 1,012/1,078 (93.9%) | 1                 |         | 1                 |        | 1                 |        |
| Mild-asthma                                               | 3/20 (15.0%)   | 60/1,078 (5.6%)     | 3.16 (0.90-11.15) | 0.073   | 1.60 (0.29-8.94)  | 0.590  | 1.22 (0.20-7.60)  | 0.832  |

|                                                                                                    |                |                     |                    |         |                     |        |                     |        |
|----------------------------------------------------------------------------------------------------|----------------|---------------------|--------------------|---------|---------------------|--------|---------------------|--------|
| Severe-asthma                                                                                      | 1/20 (5.0%)    | 6/1,078 (0.6%)      | 10.54 (1.20-92.68) | 0.034*  | 9.35 (0.43-201.98)  | 0.154  | 2.71 (0.08-96.04)   | 0.584  |
| <b>COPD</b>                                                                                        |                |                     |                    |         |                     |        |                     |        |
| Non-COPD                                                                                           | 16/20 (80.0%)  | 1,044/1,078 (96.8%) | 1                  |         | 1                   |        | 1                   |        |
| Mild-COPD                                                                                          | 2/20 (10.0%)   | 21/1,078 (1.9%)     | 6.22 (1.34-28.76)  | 0.019*  | 2.63 (0.30-23.21)   | 0.385  | 2.21 (0.23-21.62)   | 0.497  |
| Severe-COPD                                                                                        | 2/20 (10.0%)   | 13/1,078 (1.2%)     | 10.04 (2.09-48.18) | 0.004*  | 10.24 (0.89-118.09) | 0.062  | 7.35 (0.45-119.08)  | 0.160  |
| <b>Systolic blood pressure &lt; 140 mmHg and diastolic blood pressure &lt; 90 mmHg (n = 3,530)</b> |                |                     |                    |         |                     |        |                     |        |
| <b>Asthma</b>                                                                                      |                |                     |                    |         |                     |        |                     |        |
| Non-asthma                                                                                         | 82/101 (81.2%) | 3,136/3,429 (91.5%) | 1                  |         | 1                   |        | 1                   |        |
| Mild-asthma                                                                                        | 16/101 (15.8%) | 264/3,429 (7.7%)    | 2.32 (1.34-4.02)   | 0.003*  | 0.93 (0.46-1.88)    | 0.848  | 0.82 (0.39-1.71)    | 0.593  |
| Severe-asthma                                                                                      | 3/101 (3.0%)   | 29/3,429 (0.8%)     | 3.96 (1.18-13.25)  | 0.026*  | 0.37 (0.06-2.39)    | 0.294  | 0.23 (0.03-1.78)    | 0.159  |
| <b>COPD</b>                                                                                        |                |                     |                    |         |                     |        |                     |        |
| Non-COPD                                                                                           | 87/101 (86.1%) | 3,308/3,429 (96.5%) | 1                  |         | 1                   |        | 1                   |        |
| Mild-COPD                                                                                          | 7/101 (6.9%)   | 74/3,429 (2.2%)     | 3.60 (1.61-8.04)   | 0.002*  | 1.17 (0.39-3.51)    | 0.780  | 1.56 (0.50-4.87)    | 0.443  |
| Severe-COPD                                                                                        | 7/101 (6.9%)   | 47/3,429 (1.4%)     | 5.66 (2.49-12.89)  | <0.001* | 1.52 (0.51-4.55)    | 0.455  | 1.98 (0.63-6.23)    | 0.244  |
| <b>Systolic blood pressure ≥ 140 mmHg or diastolic blood pressure ≥90 mmHg (n = 536)</b>           |                |                     |                    |         |                     |        |                     |        |
| <b>Asthma</b>                                                                                      |                |                     |                    |         |                     |        |                     |        |
| Non-asthma                                                                                         | 26/31 (83.9%)  | 460/505 (91.1%)     | 1                  |         | 1                   |        | 1                   |        |
| Mild-asthma                                                                                        | 4/31 (12.9%)   | 38/505 (7.5%)       | 1.86 (0.62-5.61)   | 0.269   | 1.05 (0.26-4.21)    | 0.946  | 1.07 (0.22-5.10)    | 0.937  |
| Severe-asthma                                                                                      | 1/31 (3.2%)    | 07/505 (1.4%)       | 2.53 (0.30-21.32)  | 0.394   | 5.82 (0.35-96.76)   | 0.220  | 4.49 (0.23-89.50)   | 0.325  |
| <b>COPD</b>                                                                                        |                |                     |                    |         |                     |        |                     |        |
| Non-COPD                                                                                           | 26/31 (83.9%)  | 481/505 (95.2%)     | 1                  |         | 1                   |        | 1                   |        |
| Mild-COPD                                                                                          | 2/31 (6.5%)    | 18/505 (3.6%)       | 2.06 (0.45-9.34)   | 0.351   | 0.95 (0.11-8.13)    | 0.964  | 0.77 (0.07-8.19)    | 0.829  |
| Severe-COPD                                                                                        | 3/31 (9.7%)    | 6/505 (1.2%)        | 9.25 (2.19-39.08)  | 0.003*  | 33.28 (3.52-314.96) | 0.002* | 28.33 (3.13-256.62) | 0.003* |
| <b>Fasting blood glucose &lt; 100 mg/dL (n = 2,522)</b>                                            |                |                     |                    |         |                     |        |                     |        |
| <b>Asthma</b>                                                                                      |                |                     |                    |         |                     |        |                     |        |
| Non-asthma                                                                                         | 45/56 (80.4%)  | 2,264/2,466 (91.8%) | 1                  |         | 1                   |        | 1                   |        |
| Mild-asthma                                                                                        | 9/56 (16.1%)   | 183/2,466 (7.4%)    | 2.47 (1.19-5.14)   | 0.015*  | 0.88 (0.35-2.20)    | 0.784  | 0.77 (0.29-2.04)    | 0.594  |

|                                                      |               |                     |                   |         |                   |        |                   |        |
|------------------------------------------------------|---------------|---------------------|-------------------|---------|-------------------|--------|-------------------|--------|
| Severe-asthma                                        | 2/56 (3.6%)   | 19/2,466 (0.8%)     | 5.30 (1.20-23.42) | 0.028*  | 2.69 (0.37-19.65) | 0.328  | 1.60 (0.16-16.53) | 0.692  |
| <b>COPD</b>                                          |               |                     |                   |         |                   |        |                   |        |
| Non-COPD                                             | 48/56 (85.7%) | 2376/2,466 (96.4%)  | 1                 |         | 1                 |        | 1                 |        |
| Mild-COPD                                            | 3/56 (5.4%)   | 55/2,466 (2.2%)     | 2.70 (0.82-8.93)  | 0.104   | 1.00 (0.23-4.38)  | 0.998  | 1.06 (0.23-4.78)  | 0.943  |
| Severe-COPD                                          | 5/56 (8.9%)   | 35/2,466 (1.4%)     | 7.07 (2.66-18.84) | <0.001* | 2.84 (0.70-11.54) | 0.146  | 2.80 (0.57-13.66) | 0.203  |
| <b>Fasting blood glucose ≥ 100 mg/dL (n = 1,544)</b> |               |                     |                   |         |                   |        |                   |        |
| <b>Asthma</b>                                        |               |                     |                   |         |                   |        |                   |        |
| Non-asthma                                           | 63/76 (82.9%) | 1,332/1,468 (90.7%) | 1                 |         | 1                 |        | 1                 |        |
| Mild-asthma                                          | 11/76 (14.5%) | 119/1,468 (8.1%)    | 1.95 (1.00-3.81)  | 0.049*  | 1.02 (0.42-2.45)  | 0.967  | 0.90 (0.36-2.21)  | 0.809  |
| Severe-asthma                                        | 2/76 (2.6%)   | 17/1,468 (1.2%)     | 2.49 (0.56-11.01) | 0.229   | 0.36 (0.04-3.66)  | 0.390  | 0.27 (0.02-3.55)  | 0.316  |
| <b>COPD</b>                                          |               |                     |                   |         |                   |        |                   |        |
| Non-COPD                                             | 65/76 (85.5%) | 1,413/1,468 (96.3%) | 1                 |         | 1                 |        | 1                 |        |
| Mild-COPD                                            | 6/76 (7.9%)   | 37/1,468 (2.5%)     | 3.53 (1.44-8.65)  | 0.006*  | 1.12 (0.33-3.83)  | 0.855  | 1.53 (0.41-5.71)  | 0.531  |
| Severe-COPD                                          | 5/76 (6.6%)   | 18/1,468 (1.2%)     | 6.04 (2.17-16.77) | 0.001*  | 3.16 (0.85-11.73) | 0.085  | 3.28 (0.86-12.50) | 0.083  |
| <b>Total cholesterol &lt; 200 mg/dL (n = 2,325)</b>  |               |                     |                   |         |                   |        |                   |        |
| <b>Asthma</b>                                        |               |                     |                   |         |                   |        |                   |        |
| Non-asthma                                           | 72/91 (79.1%) | 2,037/2,234 (91.2%) | 1                 |         | 1                 |        | 1                 |        |
| Mild-asthma                                          | 17/91 (18.7%) | 173/2,234 (7.7%)    | 2.78 (1.60-4.82)  | <0.001* | 1.71 (0.84-3.50)  | 0.139  | 1.47 (0.68-3.15)  | 0.324  |
| Severe-asthma                                        | 2/91 (2.2%)   | 24/2,234 (1.1%)     | 2.36 (0.55-10.17) | 0.250   | 0.48 (0.06-3.75)  | 0.483  | 0.25 (0.03-2.34)  | 0.224  |
| <b>COPD</b>                                          |               |                     |                   |         |                   |        |                   |        |
| Non-COPD                                             | 75/91 (82.4%) | 2,149/2,234 (96.2%) | 1                 |         | 1                 |        | 1                 |        |
| Mild-COPD                                            | 7/91 (7.7%)   | 56/2,234 (2.5%)     | 3.58 (1.58-8.12)  | 0.002*  | 1.05 (0.35-3.15)  | 0.938  | 1.08 (0.34-3.44)  | 0.893  |
| Severe-COPD                                          | 9/91 (9.9%)   | 29/2,234 (1.3%)     | 8.89 (4.07-19.45) | <0.001* | 3.98 (1.29-12.29) | 0.016* | 4.34 (1.33-14.15) | 0.015* |
| <b>Total cholesterol ≥ 200 mg/dL (n = 1,741)</b>     |               |                     |                   |         |                   |        |                   |        |
| <b>Asthma</b>                                        |               |                     |                   |         |                   |        |                   |        |
| Non-asthma                                           | 36/41 (87.8%) | 1,559/1,700 (91.7%) | 1                 |         | 1                 |        | 1                 |        |
| Mild-asthma                                          | 3/41 (7.3%)   | 129/1,700 (7.6%)    | 1.01 (0.31-3.32)  | 0.991   | 0.25 (0.06-1.04)  | 0.056  | 0.25 (0.06-1.11)  | 0.069  |

|                                   |               |                     |                   |         |                   |        |                     |        |
|-----------------------------------|---------------|---------------------|-------------------|---------|-------------------|--------|---------------------|--------|
| Severe-asthma                     | 2/41 (4.9%)   | 12/1,700 (0.7%)     | 7.22 (1.56-33.43) | 0.012*  | 5.65 (0.60-53.49) | 0.131  | 5.75 (0.54-61.00)   | 0.147  |
| <b>COPD</b>                       |               |                     |                   |         |                   |        |                     |        |
| Non-COPD                          | 38/41 (92.7%) | 1,640/1,700 (96.5%) | 1                 |         | 1                 |        | 1                   |        |
| Mild-COPD                         | 2/41 (4.9%)   | 36/1,700 (2.1%)     | 2.40 (0.56-10.32) | 0.240   | 0.66 (0.10-4.47)  | 0.666  | 0.64 (0.07-5.93)    | 0.697  |
| Severe-COPD                       | 1/41 (2.4%)   | 24/1,700 (1.4%)     | 1.80 (0.24-13.64) | 0.570   | 0.91 (0.09-8.94)  | 0.938  | 1.04 (0.08-12.86)   | 0.975  |
| <b>CCI scores = 0 (n = 3,089)</b> |               |                     |                   |         |                   |        |                     |        |
| <b>Asthma</b>                     |               |                     |                   |         |                   |        |                     |        |
| Non-asthma                        | 36/41 (87.8%) | 2,804/3,048 (92.0%) | 1                 |         | 1                 |        | 1                   |        |
| Mild-asthma                       | 5/41 (12.2%)  | 214/3,048 (7.0%)    | 1.82 (0.71-4.69)  | 0.215   | 0.75 (0.24-2.35)  | 0.621  | 0.61 (0.17-2.15)    | 0.442  |
| Severe-asthma                     | 0/41 (0.0%)   | 30/3,048 (1.0%)     | N/A               |         | N/A               |        | N/A                 |        |
| <b>COPD</b>                       |               |                     |                   |         |                   |        |                     |        |
| Non-COPD                          | 36/41 (87.8%) | 2,954/3,048 (96.9%) | 1                 |         | 1                 |        | 1                   |        |
| Mild-COPD                         | 1/41 (2.4%)   | 57/3,048 (1.9%)     | 1.44 (0.19-10.68) | 0.722   | 0.69 (0.06-8.17)  | 0.765  | 0.92 (0.08-10.54)   | 0.945  |
| Severe-COPD                       | 4/41 (9.8%)   | 37/3,048 (1.2%)     | 8.88 (3.01-26.20) | <0.001* | 2.20 (0.41-11.87) | 0.360  | 4.53 (0.74-27.70)   | 0.102  |
| <b>CCI scores = 1 (n = 588)</b>   |               |                     |                   |         |                   |        |                     |        |
| <b>Asthma</b>                     |               |                     |                   |         |                   |        |                     |        |
| Non-asthma                        | 25/34 (73.5%) | 499/554 (90.1%)     | 1                 |         | 1                 |        | 1                   |        |
| Mild-asthma                       | 7/34 (20.6%)  | 50/554 (9.0%)       | 2.79 (1.15-6.79)  | 0.023*  | 1.33 (0.49-3.66)  | 0.016* | 1.45 (0.49-4.33)    | 0.028* |
| Severe-asthma                     | 2/34 (5.9%)   | 5/554 (0.9%)        | 7.99 (1.48-43.20) | 0.016*  | 8.00 (0.95-67.62) | 0.576  | 16.26 (1.62-163.44) | 0.506  |
| <b>COPD</b>                       |               |                     |                   |         |                   |        |                     |        |
| Non-COPD                          | 32/34 (94.1%) | 523/554 (94.4%)     | 1                 |         | 1                 |        | 1                   |        |
| Mild-COPD                         | 0/34 (0.0%)   | 22/554 (4.0%)       | N/A               |         | N/A               |        | N/A                 |        |
| Severe-COPD                       | 2/34 (5.9%)   | 9/554 (1.6%)        | 3.63 (0.75-17.51) | 0.108   | 3.31 (0.33-39.91) | 0.971  | 4.11 (0.39-43.38)   | 0.965  |
| <b>CCI scores ≥ 2 (n = 389)</b>   |               |                     |                   |         |                   |        |                     |        |
| <b>Asthma</b>                     |               |                     |                   |         |                   |        |                     |        |
| Non-asthma                        | 47/57 (82.5%) | 293/332 (88.3%)     | 1                 |         | 1                 |        | 1                   |        |
| Mild-asthma                       | 8/57 (14.0%)  | 38/332 (11.4%)      | 1.31 (0.58-2.99)  | 0.517   | 0.48 (0.15-1.58)  | 0.095  | 0.42 (0.12-1.44)    | 0.055  |

|                                              |                |                     |                     |         |                   |        |                    |        |
|----------------------------------------------|----------------|---------------------|---------------------|---------|-------------------|--------|--------------------|--------|
| Severe-asthma                                | 2/57 (3.5%)    | 1/332 (0.3%)        | 12.46 (1.11-140.11) | 0.041*  | 1.71 (0.04-82.12) | 0.098  | 1.02 (0.02-58.25)  | 0.065  |
| <b>COPD</b>                                  |                |                     |                     |         |                   |        |                    |        |
| Non-COPD                                     | 45/57 (78.9%)  | 312/332 (94.0%)     | 1                   |         | 1                 |        | 1                  |        |
| Mild-COPD                                    | 8/57 (14.0%)   | 13/332 (3.9%)       | 4.27 (1.68-10.86)   | 0.002*  | 1.50 (0.39-5.79)  | 0.037* | 1.84 (0.41-8.17)   | 0.170  |
| Severe-COPD                                  | 4/57 (7.0%)    | 7/332 (2.1%)        | 3.96 (1.12-14.07)   | 0.038*  | 3.02 (0.47-19.44) | 0.106  | 3.36 (0.48-23.51)  | 0.994  |
| <b>NSAID used &lt; 6 times (n = 1,972)</b>   |                |                     |                     |         |                   |        |                    |        |
| <b>Asthma</b>                                |                |                     |                     |         |                   |        |                    |        |
| Non-asthma                                   | 46/48 (95.8%)  | 1,825/1,924 (94.9%) | 1                   |         | 1                 |        | 1                  |        |
| Mild-asthma                                  | 2/48 (4.2%)    | 94/1,924 (4.9%)     | 0.84 (0.20-3.53)    | 0.816   | 0.15 (0.02-1.10)  | 0.062  | 0.06 (0.01-0.54)   | 0.013* |
| Severe-asthma                                | 0/48 (0.0%)    | 05/1,924 (0.3%)     | N/A                 |         | N/A               |        | N/A                |        |
| <b>COPD</b>                                  |                |                     |                     |         |                   |        |                    |        |
| Non-COPD                                     | 42/48 (87.5%)  | 1,870/1,924 (97.2%) | 1                   |         | 1                 |        | 1                  |        |
| Mild-COPD                                    | 2/48 (4.2%)    | 33/1,924 (1.7%)     | 2.70 (0.63-11.62)   | 0.183   | 0.67 (0.12-3.72)  | 0.648  | 1.16 (0.17-8.00)   | 0.879  |
| Severe-COPD                                  | 4/48 (8.3%)    | 21/1,924 (1.1%)     | 8.48 (2.79-25.79)   | <0.001* | 6.88 (1.37-34.63) | 0.019* | 16.84 (3.23-87.87) | 0.001* |
| <b>NSAID used ≥ 6 times (n = 2,094)</b>      |                |                     |                     |         |                   |        |                    |        |
| <b>Asthma</b>                                |                |                     |                     |         |                   |        |                    |        |
| Non-asthma                                   | 62/84 (73.8%)  | 1,771/2,010 (88.1%) | 1                   |         | 1                 |        | 1                  |        |
| Mild-asthma                                  | 18/84 (21.4%)  | 208/2,010 (10.3%)   | 2.47 (1.44-4.26)    | 0.001*  | 1.35 (0.70-2.63)  | 0.375  | 1.35 (0.68-2.68)   | 0.396  |
| Severe-asthma                                | 4/84 (4.8%)    | 31/2,010 (1.5%)     | 3.69 (1.26-10.76)   | 0.017*  | 1.46 (0.32-6.68)  | 0.628  | 1.37 (0.27-6.94)   | 0.703  |
| <b>COPD</b>                                  |                |                     |                     |         |                   |        |                    |        |
| Non-COPD                                     | 71/84 (84.5%)  | 1,919/2,010 (95.5%) | 1                   |         | 1                 |        | 1                  |        |
| Mild-COPD                                    | 7/84 (8.3%)    | 59/2,010 (2.9%)     | 3.21 (1.41-7.27)    | 0.005*  | 1.08 (0.36-3.26)  | 0.890  | 0.93 (0.29-3.02)   | 0.904  |
| Severe-COPD                                  | 6/84 (7.1%)    | 32/2,010 (1.6%)     | 5.07 (2.05-12.51)   | <0.001* | 1.53 (0.42-5.66)  | 0.522  | 1.37 (0.36-5.27)   | 0.646  |
| <b>Steroid used &lt; 3 times (n = 2,206)</b> |                |                     |                     |         |                   |        |                    |        |
| <b>Asthma</b>                                |                |                     |                     |         |                   |        |                    |        |
| Non-asthma                                   | 36/36 (100.0%) | 2,065/2,170 (95.2%) | 1                   |         | 1                 |        | 1                  |        |
| Mild-asthma                                  | 0/36 (0.0%)    | 98/2,170 (4.5%)     | N/A                 |         | N/A               |        | N/A                |        |

|                                           |               |                     |                   |         |                   |        |                     |        |
|-------------------------------------------|---------------|---------------------|-------------------|---------|-------------------|--------|---------------------|--------|
| Severe-asthma                             | 0/36 (0.0%)   | 7/2,170 (0.3%)      | N/A               |         | N/A               |        | N/A                 |        |
| <b>COPD</b>                               |               |                     |                   |         |                   |        |                     |        |
| Non-COPD                                  | 34/36 (94.4%) | 2,130/2,170 (98.2%) | 1                 |         | 1                 |        | 1                   |        |
| Mild-COPD                                 | 1/36 (2.8%)   | 30/2,170 (1.4%)     | 2.09 (0.28-15.76) | 0.475   | 1.78 (0.14-22.51) | 0.657  | 2.05 (0.14-31.14)   | 0.604  |
| Severe-COPD                               | 1/36 (2.8%)   | 10/2,170 (0.5%)     | 6.27 (0.78-50.31) | 0.084   | 0.55 (0.03-9.29)  | 0.678  | 10.53 (0.37-300.82) | 0.169  |
| <b>Steroid used ≥ 3 times (n = 1,860)</b> |               |                     |                   |         |                   |        |                     |        |
| <b>Asthma</b>                             |               |                     |                   |         |                   |        |                     |        |
| Non-asthma                                | 72/96 (75.0%) | 1,531/1,764 (86.8%) | 1                 |         | 1                 |        | 1                   |        |
| Mild-asthma                               | 20/96 (20.8%) | 204/1,764 (11.6%)   | 2.09 (1.24-3.49)  | 0.005*  | 1.23 (0.64-2.37)  | 0.543  | 1.20 (0.60-2.38)    | 0.606  |
| Severe-asthma                             | 4/96 (4.2%)   | 29/1,764 (1.6%)     | 2.93 (1.00-8.57)  | 0.049*  | 0.94 (0.21-4.15)  | 0.938  | 0.71 (0.14-3.64)    | 0.681  |
| <b>COPD</b>                               |               |                     |                   |         |                   |        |                     |        |
| Non-COPD                                  | 79/96 (82.3%) | 1659/1,764 (94.0%)  | 1                 |         | 1                 |        | 1                   |        |
| Mild-COPD                                 | 8/96 (8.3%)   | 62/1,764 (3.5%)     | 2.71 (1.25-5.85)  | 0.011*  | 0.76 (0.27-2.14)  | 0.602  | 0.77 (0.26-2.30)    | 0.635  |
| Severe-COPD                               | 9/96 (9.4%)   | 43/1,764 (2.4%)     | 4.40 (2.07-9.33)  | <0.001* | 3.91 (1.36-11.24) | 0.011* | 4.03 (1.36-11.98)   | 0.012* |
| <b>Non-hypertension (n = 2,878)</b>       |               |                     |                   |         |                   |        |                     |        |
| <b>Asthma</b>                             |               |                     |                   |         |                   |        |                     |        |
| Non-asthma                                | 34/40 (85.0%) | 2,628/2,838 (92.6%) | 1                 |         | 1                 |        | 1                   |        |
| Mild-asthma                               | 6/40 (15.0%)  | 188/2,838 (6.6%)    | 2.47 (1.02-5.95)  | 0.044   | 0.70 (0.22-2.23)  | 0.541  | 0.60 (0.18-2.04)    | 0.415  |
| Severe-asthma                             | 0/40 (0.0%)   | 22/2,838 (0.8%)     | N/A               |         | N/A               |        | N/A                 |        |
| <b>COPD</b>                               |               |                     |                   |         |                   |        |                     |        |
| Non-COPD                                  | 36/40 (90.0%) | 2,748/2,838 (96.8%) | 1                 |         | 1                 |        | 1                   |        |
| Mild-COPD                                 | 2/40 (5.0%)   | 53/2,838 (1.9%)     | 2.88 (0.68-12.28) | 0.153   | 1.25 (0.19-8.14)  | 0.814  | 1.57 (0.22-11.03)   | 0.652  |
| Severe-COPD                               | 2/40 (5.0%)   | 37/2,838 (1.3%)     | 4.13 (0.96-17.77) | 0.057   | 0.90 (0.13-6.27)  | 0.916  | 2.20 (0.29-16.81)   | 0.449  |
| <b>Hypertension (n = 1,188)</b>           |               |                     |                   |         |                   |        |                     |        |
| <b>Asthma</b>                             |               |                     |                   |         |                   |        |                     |        |
| Non-asthma                                | 74/92 (80.4%) | 968/1,096 (88.3%)   | 1                 |         | 1                 |        | 1                   |        |
| Mild-asthma                               | 14/92 (15.2%) | 114/1,096 (10.4%)   | 1.61 (0.88-2.94)  | 0.124   | 1.01 (0.49-2.08)  | 0.972  | 0.93 (0.43-1.99)    | 0.846  |

|                   |               |                     |                   |         |                   |        |                   |        |
|-------------------|---------------|---------------------|-------------------|---------|-------------------|--------|-------------------|--------|
| Severe-<br>asthma | 4/92 (4.3%)   | 14/1,096 (1.3%)     | 3.74 (1.20-11.64) | 0.023*  | 2.09 (0.45-9.65)  | 0.346  | 1.79 (0.33-9.65)  | 0.498  |
| <b>COPD</b>       |               |                     |                   |         |                   |        |                   |        |
| Non-COPD          | 77/92 (83.7%) | 1,041/1,096 (95.0%) | 1                 |         | 1                 |        | 1                 |        |
| Mild-COPD         | 7/92 (7.6%)   | 39/1,096 (3.6%)     | 2.43 (1.05-5.61)  | 0.038*  | 0.95 (0.34-2.70)  | 0.930  | 0.86 (0.27-2.73)  | 0.803  |
| Severe-<br>COPD   | 8/92 (8.7%)   | 16/1,096 (1.5%)     | 6.76 (2.81-16.29) | <0.001* | 4.19 (1.39-12.58) | 0.011* | 4.04 (1.29-12.59) | 0.016* |

\* Unconditional logistic regression model, Significance at  $P < 0.05$

† Model 1 was adjusted for age, sex, income, obesity, smoking, alcohol consumption, systolic blood pressure, diastolic blood pressure, fasting blood glucose, total cholesterol, CCI scores, number of NSAID used, number of steroid used and hypertension.

‡ Model 2 was adjusted for model 1 plus asthma and COPD.
